# Supplementary material for: Phylogenetic Analysis and Codon Usage Bias Reveal the Potential of Feline and Canine Chaphamaparvovirus for Cross-species Transmission
Source: Preprints.org preprint supplement (doi:10.20944/preprints202306.0088.v1), 2023-06-01
Supplement: Supplementary file 1 [file supplementary]

## Sheet: NS-RSCU
NS-RSCU
CODONS	TTT	TTC	TTA	TTG	CTT	CTC	CTA	CTG	ATT	ATC	ATA	GTT	GTC	GTA	GTG	TCT	TCC	TCA	TCG	AGT	AGC	CCT	CCC	CCA	CCG	ACT	ACC	ACA	ACG	GCT	GCC	GCA	GCG	TAT	TAC	CAT	CAC	CAA	CAG	AAT	AAC	AAA	AAG	GAT	GAC	GAA	GAG	TGT	TGC
AMINOACIDS	F	F	L	L	L	L	L	L	I	I	I	V	V	V	V	S	S	S	S	S	S	P	P	P	P	T	T	T	T	A	A	A	A	Y	Y	H	H	Q	Q	N	N	K	K	D	D	E	E	C	C
Carnivore_chapparvovirus-MK448316.1-USA-2018-dog	1.793	0.207	2.769	1.077	1.538	0.154	0.462	0	1.63	0.457	0.913	1.63	0.148	1.778	0.444	2.083	0.833	1.167	0.083	0.667	1.167	2.261	0.696	1.043	0	1.538	0.821	1.436	0.205	1.6	0.4	1.733	0.267	1.895	0.105	1.529	0.471	1.6	0.4	1.086	0.914	1.892	0.108	1.636	0.364	1.674	0.326	1.13	0.87
Carnivore_chapparvovirus-MN928790.1-China-2018-cat	1.733	0.267	2.85	0.9	1.5	0.15	0.6	0	1.565	0.522	0.913	1.63	0.148	1.63	0.593	2.028	0.845	1.183	0.085	0.676	1.183	2.261	0.696	1.043	0	1.5	0.8	1.5	0.2	1.6	0.533	1.6	0.267	1.889	0.111	1.529	0.471	1.548	0.452	1.111	0.889	1.946	0.054	1.625	0.375	1.581	0.419	1.083	0.917
Carnivore_chapparvovirus-MN928791.1-China-2019-cat	1.724	0.276	2.4	1.05	1.65	0.15	0.6	0.15	1.5	0.587	0.913	1.6	0.133	1.6	0.667	2	0.833	1.25	0.083	0.667	1.167	2.261	0.696	1.043	0	1.538	0.718	1.538	0.205	1.6	0.533	1.6	0.267	1.889	0.111	1.529	0.471	1.533	0.467	1.111	0.889	1.946	0.054	1.688	0.312	1.581	0.419	1.13	0.87
Carnivore_chapparvovirus-MT123283.1-China-2018-dog	1.724	0.276	2.429	1.143	1.571	0.286	0.571	0	1.565	0.522	0.913	1.63	0.148	1.63	0.593	1.971	0.857	1.2	0.086	0.686	1.2	2.182	0.727	1.091	0	1.5	0.8	1.4	0.3	1.677	0.516	1.548	0.258	1.889	0.111	1.529	0.471	1.467	0.533	1.135	0.865	1.892	0.108	1.613	0.387	1.636	0.364	1.083	0.917
Carnivore_chapparvovirus-MT123284.1-China-2019-dog	1.724	0.276	2.488	1.171	1.463	0.293	0.585	0	1.533	0.533	0.933	1.778	0.148	1.63	0.444	1.859	1.014	1.183	0.085	0.676	1.183	2.261	0.696	1.043	0	1.463	0.78	1.463	0.293	1.6	0.533	1.467	0.4	1.889	0.111	1.529	0.471	1.467	0.533	1.111	0.889	1.944	0.056	1.742	0.258	1.636	0.364	1.043	0.957
Carnivore_chapparvovirus-MT123285.1-China-2019-dog	1.733	0.267	2.923	0.923	1.538	0.154	0.462	0	1.565	0.522	0.913	1.63	0.296	1.63	0.444	2.083	0.833	1.167	0.083	0.667	1.167	2.261	0.696	1.043	0	1.463	0.878	1.463	0.195	1.548	0.516	1.419	0.516	2	0	1.412	0.588	1.586	0.414	1.143	0.857	1.892	0.108	1.636	0.364	1.674	0.326	1.182	0.818
Carnivore_chapparvovirus-MT123286.1-China-2019-dog	1.733	0.267	2.308	1.385	1.538	0.154	0.615	0	1.533	0.533	0.933	1.655	0.276	1.517	0.552	2.083	0.833	1.167	0.083	0.667	1.167	2.261	0.696	1.043	0	1.5	0.8	1.5	0.2	1.548	0.645	1.677	0.129	1.889	0.111	1.529	0.471	1.533	0.467	1.081	0.919	1.947	0.053	1.613	0.387	1.619	0.381	1.182	0.818
Carnivore_chapparvovirus-MT123287.1-China-2019-dog	1.733	0.267	2.462	1.231	1.538	0.154	0.615	0	1.565	0.522	0.913	1.429	0.286	1.714	0.571	2.057	0.771	1.114	0.171	0.686	1.2	2.4	0.8	0.8	0	1.5	0.8	1.5	0.2	1.467	0.667	1.6	0.267	1.889	0.111	1.529	0.471	1.533	0.467	1.111	0.889	1.947	0.053	1.677	0.323	1.659	0.341	1.091	0.909
Carnivore_chapparvovirus-MT710947.1-Italy-2019-dog	1.8	0.2	2.7	1.05	1.5	0.15	0.6	0	1.66	0.447	0.894	1.538	0.154	1.692	0.615	2.028	0.845	1.183	0.085	0.676	1.183	2.087	0.696	1.217	0	1.5	0.8	1.5	0.2	1.6	0.4	1.733	0.267	1.889	0.111	1.529	0.471	1.6	0.4	1.167	0.833	1.892	0.108	1.625	0.375	1.628	0.372	1.083	0.917
Carnivore_chapparvovirus-MT710948.1-Italy-2019-dog	1.8	0.2	2.7	1.05	1.5	0.15	0.6	0	1.66	0.447	0.894	1.538	0.154	1.692	0.615	2.028	0.845	1.183	0.085	0.676	1.183	2	0.727	1.273	0	1.5	0.8	1.5	0.2	1.6	0.4	1.733	0.267	1.889	0.111	1.529	0.471	1.6	0.4	1.167	0.833	1.892	0.108	1.625	0.375	1.628	0.372	1.083	0.917
Carnivore_chapparvovirus-OK546100.1-Canada-2016-dog	1.733	0.267	2.55	1.2	1.5	0.15	0.6	0	1.565	0.522	0.913	1.63	0.148	1.481	0.741	2.028	0.845	1.099	0.169	0.676	1.183	2.261	0.696	1.043	0	1.5	0.8	1.5	0.2	1.6	0.4	1.733	0.267	1.889	0.111	1.556	0.444	1.6	0.4	1.143	0.857	1.946	0.054	1.636	0.364	1.628	0.372	1.083	0.917
Carnivore_chapparvovirus-OK546101.1-Canada-2009-dog	1.733	0.267	2.7	1.05	1.5	0.15	0.6	0	1.565	0.522	0.913	1.63	0.148	1.778	0.444	2.028	0.845	1.183	0.085	0.676	1.183	2.261	0.696	1.043	0	1.5	0.7	1.6	0.2	1.6	0.533	1.6	0.267	1.889	0.111	1.529	0.471	1.6	0.4	1.143	0.857	1.946	0.054	1.636	0.364	1.674	0.326	1.083	0.917
Carnivore_chapparvovirus-OK546102.1-Canada-2011-dog	1.733	0.267	2	1.231	1.692	0.154	0.308	0.615	1.63	0.522	0.848	1.6	0.267	1.6	0.533	1.89	0.658	1.479	0.082	0.493	1.397	2.087	0.522	1.391	0	1.524	0.762	1.524	0.19	1.63	0.296	1.778	0.296	1.667	0.333	1.529	0.471	1.613	0.387	1.211	0.789	1.838	0.162	1.533	0.467	1.619	0.381	0.917	1.083
Carnivore_chapparvovirus-OM640108.1-Canada-2014-dog	1.733	0.267	2.7	1.05	1.65	0	0.6	0	1.565	0.522	0.913	1.63	0.148	1.778	0.444	2.028	0.845	1.183	0.085	0.676	1.183	2.435	0.522	1.043	0	1.463	0.878	1.463	0.195	1.655	0.414	1.655	0.276	1.882	0.118	1.667	0.333	1.6	0.4	1.081	0.919	1.892	0.108	1.677	0.323	1.674	0.326	1.083	0.917
Carnivore_chapparvovirus-OM640109.1-Canada-2014-dog	1.667	0.333	2.769	0.615	1.692	0.154	0.462	0.308	1.37	0.652	0.978	1.655	0.276	1.517	0.552	1.917	0.667	1.5	0.083	0.417	1.417	2.087	0.522	1.391	0	1.4	0.8	1.6	0.2	1.793	0.276	1.517	0.414	1.778	0.222	1.647	0.353	1.548	0.452	1.211	0.789	1.944	0.056	1.6	0.4	1.674	0.326	1	1
Feline_chaphamaparvovirus-MN396757.1-Canada-2018-cat	1.478	0.522	2.478	1.696	0.522	0.391	0.783	0.13	1.63	0.326	1.043	2	0.571	0.857	0.571	1.5	0.667	1.333	0.083	0.583	1.833	1.333	0.444	1.926	0.296	1.659	0.78	1.268	0.293	2.286	0.571	1.143	0	1.667	0.333	1.263	0.737	1.5	0.5	1.333	0.667	1.6	0.4	1.55	0.45	1.765	0.235	1	1
Feline_chaphamaparvovirus-MN794869.1-USA-2019-cat	1.565	0.435	2.553	1.66	0.511	0.383	0.766	0.128	1.568	0.341	1.091	2.133	0.533	0.8	0.533	1.459	0.73	1.378	0.081	0.568	1.784	1.44	0.32	2.08	0.16	1.8	0.7	1.3	0.2	2.207	0.69	1.103	0	1.667	0.333	1.263	0.737	1.52	0.48	1.333	0.667	1.659	0.341	1.55	0.45	1.706	0.294	1	1
Feline_chaphamaparvovirus-MT708230.1-China-2019-cat	1.565	0.435	2.667	1.467	0.533	0.4	0.667	0.267	1.605	0.279	1.116	1.939	0.606	0.848	0.606	1.459	0.649	1.378	0.081	0.649	1.784	1.385	0.462	2	0.154	1.744	0.718	1.333	0.205	2.345	0.552	1.103	0	1.778	0.222	1.263	0.737	1.5	0.5	1.389	0.611	1.55	0.45	1.61	0.39	1.758	0.242	1	1
Feline_chaphamaparvovirus-MT708231.1-China-2019-cat	1.478	0.522	2.533	1.6	0.533	0.4	0.8	0.133	1.605	0.419	0.977	1.939	0.606	0.97	0.485	1.479	0.658	1.479	0.082	0.575	1.726	1.28	0.48	2.08	0.16	1.81	0.762	1.238	0.19	2.308	0.615	1.077	0	1.579	0.421	1.455	0.545	1.364	0.636	1.412	0.588	1.55	0.45	1.538	0.462	1.706	0.294	1	1
Feline_chaphamaparvovirus-MW404251.1-Italy-2019-cat	1.5	0.5	2.533	1.6	0.533	0.4	0.8	0.133	1.565	0.326	1.109	2.143	0.571	0.571	0.714	1.521	0.676	1.437	0.085	0.423	1.859	1.385	0.462	1.846	0.308	1.756	0.78	1.171	0.293	2.286	0.571	1.143	0	1.667	0.333	1.158	0.842	1.5	0.5	1.351	0.649	1.641	0.359	1.55	0.45	1.714	0.286	1	1
Feline_chaphamaparvovirus-MW404252.1-Italy-2019-cat	1.478	0.522	2.739	1.435	0.522	0.391	0.783	0.13	1.63	0.326	1.043	1.857	0.714	0.857	0.571	1.479	0.658	1.397	0.082	0.575	1.808	1.231	0.615	2	0.154	1.756	0.78	1.171	0.293	2.286	0.571	1.143	0	1.667	0.333	1.158	0.842	1.5	0.5	1.333	0.667	1.6	0.4	1.55	0.45	1.771	0.229	1	1
Feline_chaphamaparvovirus-MW404253.1-Italy-2019-cat	1.565	0.435	2.667	1.6	0.533	0.4	0.533	0.267	1.6	0.267	1.133	2.133	0.667	0.667	0.533	1.521	0.676	1.437	0.085	0.507	1.775	1.385	0.462	1.692	0.462	1.8	0.7	1.2	0.3	2.286	0.571	1.143	0	1.778	0.222	1.368	0.632	1.478	0.522	1.333	0.667	1.65	0.35	1.538	0.462	1.758	0.242	1	1
Feline_chaphamaparvovirus-MZ031965.1-China-2020-cat	1.478	0.522	2.667	1.6	0.533	0.4	0.667	0.133	1.568	0.273	1.159	2	0.625	0.75	0.625	1.479	0.658	1.397	0.082	0.658	1.726	1.385	0.462	2	0.154	1.8	0.7	1.2	0.3	2.286	0.571	1.143	0	1.778	0.222	1.263	0.737	1.5	0.5	1.368	0.632	1.6	0.4	1.55	0.45	1.818	0.182	1	1
Feline_chaphamaparvovirus-MZ031966.1-China-2020-cat	1.478	0.522	2.609	1.565	0.522	0.391	0.783	0.13	1.568	0.341	1.091	2.133	0.533	0.8	0.533	1.479	0.658	1.397	0.082	0.575	1.808	1.385	0.462	2	0.154	1.756	0.78	1.268	0.195	2.286	0.571	1.143	0	1.667	0.333	1.263	0.737	1.417	0.583	1.333	0.667	1.55	0.45	1.55	0.45	1.706	0.294	1	1
Feline_chaphamaparvovirus-OP499830.1-China-2022-cat	1.565	0.435	2.667	1.6	0.533	0.4	0.667	0.133	1.605	0.279	1.116	2	0.588	0.824	0.588	1.459	0.649	1.378	0.081	0.649	1.784	1.385	0.462	2	0.154	1.744	0.718	1.231	0.308	2.286	0.571	1.143	0	1.778	0.222	1.263	0.737	1.5	0.5	1.314	0.686	1.6	0.4	1.619	0.381	1.758	0.242	1	1
Feline_chaphamaparvovirus-OP499831.1-China-2022-cat	1.565	0.435	2.8	1.467	0.533	0.4	0.667	0.133	1.605	0.279	1.116	2	0.588	0.824	0.588	1.479	0.658	1.397	0.082	0.658	1.726	1.385	0.462	2	0.154	1.744	0.718	1.231	0.308	2.286	0.571	1.143	0	1.778	0.222	1.263	0.737	1.5	0.5	1.333	0.667	1.6	0.4	1.61	0.39	1.758	0.242	1	1
Feline_chaphamaparvovirus-OP499832.1-China-2022-cat	1.565	0.435	2.8	1.467	0.533	0.4	0.667	0.133	1.605	0.279	1.116	2	0.588	0.824	0.588	1.459	0.649	1.378	0.081	0.649	1.784	1.385	0.462	2	0.154	1.744	0.718	1.231	0.308	2.286	0.571	1.143	0	1.778	0.222	1.263	0.737	1.5	0.5	1.333	0.667	1.6	0.4	1.61	0.39	1.758	0.242	1	1
Feline_chaphamaparvovirus-OP499833.1-China-2022-cat	1.565	0.435	2.8	1.467	0.533	0.4	0.667	0.133	1.605	0.279	1.116	2	0.588	0.824	0.588	1.459	0.649	1.378	0.081	0.649	1.784	1.385	0.462	2	0.154	1.744	0.718	1.231	0.308	2.286	0.571	1.143	0	1.778	0.222	1.263	0.737	1.5	0.5	1.314	0.686	1.6	0.4	1.619	0.381	1.758	0.242	1	1
VP-RSCU
CODONS	TTT	TTC	TTA	TTG	CTT	CTC	CTA	CTG	ATT	ATC	ATA	GTT	GTC	GTA	GTG	TCT	TCC	TCA	TCG	AGT	AGC	CCT	CCC	CCA	CCG	ACT	ACC	ACA	ACG	GCT	GCC	GCA	GCG	TAT	TAC	CAT	CAC	CAA	CAG	AAT	AAC	AAA	AAG	GAT	GAC	GAA	GAG	TGT	TGC
AMINOACIDS	F	F	L	L	L	L	L	L	I	I	I	V	V	V	V	S	S	S	S	S	S	P	P	P	P	T	T	T	T	A	A	A	A	Y	Y	H	H	Q	Q	N	N	K	K	D	D	E	E	C	C
Carnivore_chapparvovirus-MK448316.1-USA-2018	2	0	2.889	0.444	0.889	0.667	1.111	0	1.875	0.188	0.938	1.895	0	1.895	0.211	2	0.333	1.833	0.167	0.5	1.167	1.455	0.485	1.939	0.121	1.286	0.286	1.929	0.5	1.6	0.133	2.267	0	1.172	0.828	1.692	0.308	1.733	0.267	1.5	0.5	1.923	0.077	1.5	0.5	2	0	1.714	0.286
Carnivore_chapparvovirus-MN928790.1-China-2018	2	0	3	0.25	1	0.5	1	0.25	1.714	0.214	1.071	1.684	0.211	1.895	0.211	2.167	0.333	1.833	0.167	0.5	1	1.576	0.606	1.576	0.242	1.357	0.357	1.857	0.429	1.6	0.133	2.267	0	1.259	0.741	1.692	0.308	1.733	0.267	1.543	0.457	1.778	0.222	1.484	0.516	2	0	1.714	0.286
Carnivore_chapparvovirus-MN928791.1-China-2019	2	0	3	0.25	1	0.5	1.25	0	1.7	0.2	1.1	1.778	0.222	1.556	0.444	2.057	0.343	1.886	0.171	0.514	1.029	1.529	0.588	1.765	0.118	1.382	0.364	1.818	0.436	1.6	0.133	2.267	0	1.259	0.741	1.846	0.154	1.714	0.286	1.529	0.471	1.926	0.074	1.5	0.5	2	0	1.667	0.333
Carnivore_chapparvovirus-MT123283.1-China-2018	2	0	3.12	0	1.2	0.48	1.2	0	1.759	0.103	1.138	2.105	0	1.684	0.211	2.057	0.343	1.714	0.343	0.514	1.029	1.455	0.606	1.818	0.121	1.382	0.364	1.964	0.291	1.6	0.133	2.267	0	1.333	0.667	1.692	0.308	1.733	0.267	1.486	0.514	1.76	0.24	1.5	0.5	2	0	1.667	0.333
Carnivore_chapparvovirus-MT123284.1-China-2019	2	0	3	0.25	1	0.5	1.25	0	1.7	0.2	1.1	1.778	0.222	1.556	0.444	2.057	0.343	1.886	0.171	0.514	1.029	1.697	0.485	1.576	0.242	1.309	0.364	1.891	0.436	1.6	0.133	2.267	0	1.286	0.714	1.692	0.308	1.733	0.267	1.529	0.471	1.926	0.074	1.5	0.5	1.913	0.087	1.667	0.333
Carnivore_chapparvovirus-MT123285.1-China-2019	2	0	2.88	0.48	0.72	0.72	1.2	0	1.714	0.214	1.071	1.8	0.2	1.8	0.2	2.057	0.343	1.886	0.171	0.514	1.029	1.647	0.588	1.529	0.235	1.309	0.364	1.818	0.509	1.517	0.138	2.345	0	1.259	0.741	1.692	0.308	1.733	0.267	1.471	0.529	1.923	0.077	1.5	0.5	2	0	1.714	0.286
Carnivore_chapparvovirus-MT123286.1-China-2019	1.9	0.1	3	0.25	1	0.5	1.25	0	1.778	0.111	1.111	1.905	0.19	1.714	0.19	2.057	0.343	1.886	0.171	0.686	0.857	1.647	0.588	1.647	0.118	1.382	0.364	1.891	0.364	1.379	0.276	2.345	0	1.286	0.714	1.692	0.308	1.733	0.267	1.529	0.471	1.846	0.154	1.5	0.5	2	0	1.667	0.333
Carnivore_chapparvovirus-MT123287.1-China-2019	2	0	3	0.25	1	0.5	1.25	0	1.759	0.207	1.034	1.684	0.211	1.895	0.211	2.057	0.343	1.886	0.171	0.514	1.029	1.576	0.606	1.697	0.121	1.309	0.364	1.891	0.436	1.6	0.133	2.267	0	1.286	0.714	1.692	0.308	1.6	0.4	1.529	0.471	1.84	0.16	1.5	0.5	2	0	1.667	0.333
Carnivore_chapparvovirus-MT710947.1-Italy-2019	2	0	3.25	0	1	0.5	1.25	0	1.759	0.103	1.138	2	0	2	0	2.057	0.343	1.543	0.514	0.514	1.029	1.455	0.606	1.697	0.242	1.333	0.37	2	0.296	1.6	0.133	2.267	0	1.214	0.786	1.692	0.308	1.733	0.267	1.529	0.471	1.923	0.077	1.5	0.5	2	0	1.667	0.333
Carnivore_chapparvovirus-MT710948.1-Italy-2019	2	0	3.25	0	1	0.5	1.25	0	1.821	0.107	1.071	2	0	2	0	2.057	0.343	1.543	0.514	0.514	1.029	1.455	0.606	1.697	0.242	1.309	0.364	2.036	0.291	1.6	0.133	2.267	0	1.214	0.786	1.692	0.308	1.733	0.267	1.529	0.471	1.923	0.077	1.5	0.5	2	0	1.667	0.333
Carnivore_chapparvovirus-OK546100.1-Canada-2016	2	0	3	0.25	1	0.5	1.25	0	1.9	0.1	1	1.895	0	1.895	0.211	1.886	0.514	1.886	0.171	0.514	1.029	1.455	0.606	1.818	0.121	1.309	0.364	1.891	0.436	1.6	0.267	2	0.133	1.286	0.714	1.692	0.308	1.733	0.267	1.529	0.471	1.846	0.154	1.5	0.5	2	0	1.667	0.333
Carnivore_chapparvovirus-OK546101.1-Canada-2009	2	0	3	0.25	1	0.5	1.25	0	1.862	0.103	1.034	1.895	0	1.895	0.211	2.057	0.343	1.886	0.171	0.514	1.029	1.455	0.606	1.818	0.121	1.309	0.364	1.891	0.436	1.6	0.133	2.267	0	1.286	0.714	1.692	0.308	1.733	0.267	1.529	0.471	1.846	0.154	1.5	0.5	2	0	1.667	0.333
Carnivore_chapparvovirus-OK546102.1-Canada-2011	1.7	0.3	3.25	0.5	0.75	0.25	1.25	0	1.448	0.517	1.034	1.778	0.222	2	0	1.622	0.649	2.27	0	0.973	0.486	1.455	0.364	1.818	0.364	1.154	0.385	2.231	0.231	1.419	0	2.452	0.129	1.357	0.643	1.5	0.5	1.733	0.267	1.657	0.343	1.846	0.154	1.438	0.562	2	0	2	0
Carnivore_chapparvovirus-OM640108.1-Canada-2014	2	0	3	0.25	1	0.5	1.25	0	1.7	0.2	1.1	2	0	1.778	0.222	2.057	0.343	1.886	0.171	0.514	1.029	1.455	0.606	1.697	0.242	1.309	0.364	2.036	0.291	1.6	0.133	2.267	0	1.286	0.714	1.692	0.308	1.733	0.267	1.6	0.4	1.923	0.077	1.484	0.516	2	0	1.667	0.333
Carnivore_chapparvovirus-OM640109.1-Canada-2014	1.7	0.3	3.5	0.25	1	0	1.25	0	1.448	0.517	1.034	1.778	0.222	2	0	1.297	0.973	2.108	0.162	0.811	0.649	1.333	0.485	1.818	0.364	1.077	0.462	2.231	0.231	1.29	0.129	2.323	0.258	1.429	0.571	1.538	0.462	1.733	0.267	1.647	0.353	1.84	0.16	1.438	0.562	2	0	2	0
Feline_chaphamaparvovirus-MN396757.1-Canada-2018	0.909	1.091	2.75	0.25	0.75	0.25	1.25	0.75	0.882	0.441	1.676	0.533	1.067	2.4	0	0.828	0	2.69	0.207	1.241	1.034	0.914	0	3.086	0	1.286	0.429	2.071	0.214	1.333	0	2.444	0.222	1.462	0.538	1.571	0.429	1.684	0.316	1.545	0.455	1.926	0.074	1.29	0.71	1.895	0.105	0.8	1.2
Feline_chaphamaparvovirus-MN794869.1-USA-2019	0.909	1.091	2.75	0.25	0.75	0.25	1.25	0.75	0.909	0.364	1.727	0.533	1.067	2.4	0	0.828	0	2.69	0.207	1.241	1.034	0.914	0	2.857	0.229	1.214	0.429	2.143	0.214	1.333	0	2.444	0.222	1.462	0.538	1.571	0.429	1.789	0.211	1.545	0.455	2	0	1.312	0.688	1.895	0.105	0.8	1.2
Feline_chaphamaparvovirus-MT708230.1-China-2019	0.952	1.048	2.75	0.25	0.75	0.25	1.25	0.75	0.794	0.441	1.765	0.533	1.067	2.4	0	0.857	0.214	2.571	0.214	1.286	0.857	0.914	0	3.086	0	1.31	0.483	2.069	0.138	1.263	0	2.526	0.211	1.429	0.571	1.667	0.333	1.6	0.4	1.545	0.455	2	0	1.333	0.667	1.895	0.105	1	1
Feline_chaphamaparvovirus-MT708231.1-China-2019	0.909	1.091	2.75	0.25	0.75	0.25	1.25	0.75	0.882	0.441	1.676	0.533	1.067	2.4	0	0.857	0	2.571	0.214	1.286	1.071	0.914	0	2.971	0.114	1.214	0.429	2.214	0.143	1.263	0	2.526	0.211	1.462	0.538	1.571	0.429	1.684	0.316	1.545	0.455	2	0	1.29	0.71	1.895	0.105	0.8	1.2
Feline_chaphamaparvovirus-MW404251.1-Italy-2019	0.909	1.091	2.75	0.25	0.75	0.25	1.25	0.75	0.857	0.429	1.714	0.571	1.143	2.286	0	0.828	0	2.483	0.414	1.241	1.034	0.914	0	2.971	0.114	1.214	0.429	2.143	0.214	1.333	0	2.444	0.222	1.462	0.538	1.571	0.429	1.684	0.316	1.591	0.409	2	0	1.29	0.71	1.9	0.1	0.8	1.2
Feline_chaphamaparvovirus-MW404252.1-Italy-2019	0.909	1.091	2.75	0.25	0.75	0.25	1.25	0.75	0.857	0.429	1.714	0.571	1.143	2.286	0	0.828	0	2.69	0.207	1.241	1.034	0.914	0.114	2.857	0.114	1.286	0.429	2.143	0.143	1.333	0	2.444	0.222	1.462	0.538	1.571	0.429	1.789	0.211	1.591	0.409	1.926	0.074	1.29	0.71	1.895	0.105	0.8	1.2
Feline_chaphamaparvovirus-MW404253.1-Italy-2019	0.909	1.091	2.75	0.25	0.75	0.25	1.25	0.75	0.857	0.429	1.714	0.571	1.143	2.286	0	0.828	0	2.483	0.414	1.241	1.034	0.914	0	2.971	0.114	1.214	0.429	2.143	0.214	1.333	0	2.444	0.222	1.407	0.593	1.6	0.4	1.684	0.316	1.571	0.429	2	0	1.29	0.71	1.789	0.211	1	1
Feline_chaphamaparvovirus-MW404254.1-Italy-2019	0.909	1.091	2.75	0.25	0.75	0.25	1.25	0.75	0.857	0.429	1.714	0.571	1.143	2.286	0	0.828	0	2.69	0.207	1.241	1.034	0.914	0	2.971	0.114	1.214	0.429	2.143	0.214	1.333	0	2.444	0.222	1.462	0.538	1.571	0.429	1.684	0.316	1.6	0.4	2	0	1.267	0.733	1.895	0.105	0.8	1.2
Feline_chaphamaparvovirus-MW404255.1-Italy-2019	0.909	1.091	2.75	0.25	0.75	0.25	1.25	0.75	0.857	0.429	1.714	0.571	1.143	2.286	0	0.828	0	2.69	0.207	1.241	1.034	0.914	0	2.971	0.114	1.214	0.429	2.143	0.214	1.333	0	2.222	0.444	1.462	0.538	1.571	0.429	1.684	0.316	1.6	0.4	2	0	1.267	0.733	1.895	0.105	0.8	1.2
Feline_chaphamaparvovirus-MZ031965.1-China-2020	0.909	1.091	2.75	0.25	0.75	0.25	1.25	0.75	0.909	0.364	1.727	0.533	1.067	2.4	0	0.8	0	2.8	0.2	1.2	1	0.914	0	3.086	0	1.286	0.5	2.071	0.143	1.333	0	2.667	0	1.429	0.571	1.636	0.364	1.8	0.2	1.609	0.391	2	0	1.267	0.733	1.895	0.105	1	1
Feline_chaphamaparvovirus-MZ031966.1-China-2020	0.909	1.091	2.75	0.25	0.75	0.25	1.25	0.75	0.882	0.441	1.676	0.533	1.067	2.4	0	0.857	0	2.571	0.214	1.286	1.071	0.914	0	2.971	0.114	1.214	0.429	2.214	0.143	1.263	0	2.526	0.211	1.462	0.538	1.571	0.429	1.684	0.316	1.545	0.455	2	0	1.29	0.71	1.895	0.105	0.8	1.2
Feline_chaphamaparvovirus-MZ712100.1-Turkey-2020	0.9	1.1	2.88	0.24	0.72	0.24	1.2	0.72	0.917	0.417	1.667	0.571	1.143	2.286	0	0.8	0	2.8	0.2	1.4	0.8	0.824	0	3.176	0	1.259	0.444	2.074	0.222	1.556	0	2.444	0	1.481	0.519	1.5	0.5	1.7	0.3	1.644	0.356	1.926	0.074	1.241	0.759	2	0	0.8	1.2
Feline_chaphamaparvovirus-OP499830.1-China-2022	0.909	1.091	2.75	0.25	0.75	0.25	1.25	0.75	0.882	0.441	1.676	0.533	1.067	2.133	0.267	1	0	2.8	0.2	1.2	0.8	0.914	0	2.971	0.114	1.309	0.436	2.036	0.218	1.333	0	2.667	0	1.481	0.519	1.636	0.364	1.6	0.4	1.609	0.391	2	0	1.267	0.733	1.895	0.105	0.8	1.2
Feline_chaphamaparvovirus-OP499831.1-China-2022	0.909	1.091	2.75	0.25	0.75	0.25	1.25	0.75	0.882	0.441	1.676	0.533	1.067	2.133	0.267	1	0	2.8	0.2	1.2	0.8	0.914	0	2.971	0.114	1.309	0.436	2.036	0.218	1.333	0	2.667	0	1.429	0.571	1.636	0.364	1.6	0.4	1.609	0.391	2	0	1.267	0.733	1.895	0.105	1	1
Feline_chaphamaparvovirus-OP499832.1-China-2022	0.909	1.091	2.75	0.25	0.75	0.25	1.25	0.75	0.882	0.441	1.676	0.533	1.067	2.133	0.267	1.034	0	2.69	0.207	1.241	0.828	0.914	0	2.971	0.114	1.309	0.436	2.036	0.218	1.333	0	2.667	0	1.429	0.571	1.636	0.364	1.619	0.381	1.609	0.391	2	0	1.267	0.733	1.895	0.105	1	1
Feline_chaphamaparvovirus-OP499833.1-China-2022	0.909	1.091	2.75	0.25	0.75	0.25	1.25	0.75	0.882	0.441	1.676	0.533	1.067	2.133	0.267	1	0	2.8	0.2	1.2	0.8	0.914	0	2.971	0.114	1.309	0.436	2.036	0.218	1.333	0	2.667	0	1.429	0.571	1.636	0.364	1.6	0.4	1.609	0.391	2	0	1.267	0.733	1.895	0.105	1	1
Complete sequence-RSCU
CODONS	TTT	TTC	TTA	TTG	CTT	CTC	CTA	CTG	ATT	ATC	ATA	GTT	GTC	GTA	GTG	TCT	TCC	TCA	TCG	AGT	AGC	CCT	CCC	CCA	CCG	ACT	ACC	ACA	ACG	GCT	GCC	GCA	GCG	TAT	TAC	CAT	CAC	CAA	CAG	AAT	AAC	AAA	AAG	GAT	GAC	GAA	GAG	TGT	TGC
AMINOACIDS	F	F	L	L	L	L	L	L	I	I	I	V	V	V	V	S	S	S	S	S	S	P	P	P	P	T	T	T	T	A	A	A	A	Y	Y	H	H	Q	Q	N	N	K	K	D	D	E	E	C	C
Feline_chaphamaparvovirus-MN396757.1-Canada-2018-cat	1.2	0.8	2.571	1.2	0.6	0.343	0.943	0.343	1.312	0.375	1.312	1.488	0.744	1.395	0.372	1.307	0.475	1.723	0.119	0.772	1.604	1.097	0.194	2.581	0.129	1.443	0.577	1.732	0.247	1.913	0.348	1.652	0.087	1.545	0.455	1.394	0.606	1.581	0.419	1.45	0.55	1.731	0.269	1.437	0.563	1.811	0.189	0.96	1.04
Feline_chaphamaparvovirus-MN794869.1-USA-2019-cat	1.244	0.756	2.62	1.183	0.592	0.338	0.93	0.338	1.286	0.351	1.364	1.6	0.711	1.333	0.356	1.282	0.524	1.748	0.117	0.757	1.573	1.133	0.133	2.533	0.2	1.458	0.542	1.792	0.208	1.872	0.426	1.617	0.085	1.545	0.455	1.394	0.606	1.636	0.364	1.45	0.55	1.794	0.206	1.444	0.556	1.774	0.226	0.96	1.04
Feline_chaphamaparvovirus-MW404251.1-Italy-2019-cat	1.217	0.783	2.609	1.13	0.609	0.348	0.957	0.348	1.259	0.37	1.37	1.619	0.762	1.143	0.476	1.32	0.48	1.74	0.18	0.66	1.62	1.115	0.197	2.492	0.197	1.443	0.577	1.732	0.247	1.913	0.348	1.652	0.087	1.545	0.455	1.333	0.667	1.581	0.419	1.481	0.519	1.788	0.212	1.437	0.563	1.782	0.218	0.96	1.04
Feline_chaphamaparvovirus-MW404252.1-Italy-2019-cat	1.2	0.8	2.743	1.029	0.6	0.343	0.943	0.343	1.296	0.37	1.333	1.429	0.857	1.333	0.381	1.294	0.471	1.765	0.118	0.765	1.588	1.049	0.328	2.492	0.131	1.485	0.577	1.732	0.206	1.913	0.348	1.652	0.087	1.545	0.455	1.333	0.667	1.628	0.372	1.475	0.525	1.731	0.269	1.437	0.563	1.815	0.185	0.96	1.04
Feline_chaphamaparvovirus-MW404253.1-Italy-2019-cat	1.244	0.756	2.696	1.13	0.609	0.348	0.783	0.435	1.275	0.338	1.388	1.636	0.818	1.182	0.364	1.32	0.48	1.74	0.18	0.72	1.56	1.115	0.197	2.426	0.262	1.458	0.542	1.75	0.25	1.913	0.348	1.652	0.087	1.556	0.444	1.471	0.529	1.571	0.429	1.457	0.543	1.794	0.206	1.429	0.571	1.769	0.231	1	1
Feline_chaphamaparvovirus-MT708230.1-China-2019-cat	1.273	0.727	2.696	1.043	0.609	0.348	0.87	0.435	1.247	0.351	1.403	1.5	0.75	1.333	0.417	1.294	0.529	1.706	0.118	0.824	1.529	1.115	0.197	2.623	0.066	1.485	0.577	1.773	0.165	1.917	0.333	1.667	0.083	1.565	0.435	1.419	0.581	1.545	0.455	1.475	0.525	1.735	0.265	1.493	0.507	1.808	0.192	1	1
Feline_chaphamaparvovirus-MT708231.1-China-2019-cat	1.2	0.8	2.609	1.13	0.609	0.348	0.957	0.348	1.286	0.429	1.286	1.5	0.75	1.417	0.333	1.307	0.475	1.782	0.119	0.772	1.545	1.067	0.2	2.6	0.133	1.469	0.571	1.796	0.163	1.867	0.356	1.689	0.089	1.511	0.489	1.5	0.5	1.512	0.488	1.487	0.513	1.731	0.269	1.429	0.571	1.774	0.226	0.957	1.043
Feline_chaphamaparvovirus-MZ031965.1-China-2020-cat	1.2	0.8	2.696	1.13	0.609	0.348	0.87	0.348	1.286	0.312	1.403	1.532	0.766	1.277	0.426	1.282	0.466	1.806	0.117	0.816	1.515	1.115	0.197	2.623	0.066	1.5	0.583	1.708	0.208	1.913	0.348	1.739	0	1.565	0.435	1.4	0.6	1.636	0.364	1.5	0.5	1.761	0.239	1.429	0.571	1.846	0.154	1	1
Feline_chaphamaparvovirus-MZ031966.1-China-2020-cat	1.2	0.8	2.657	1.114	0.6	0.343	0.943	0.343	1.269	0.385	1.346	1.6	0.711	1.333	0.356	1.307	0.475	1.723	0.119	0.772	1.604	1.115	0.197	2.557	0.131	1.443	0.577	1.814	0.165	1.872	0.34	1.702	0.085	1.545	0.455	1.394	0.606	1.535	0.465	1.45	0.55	1.731	0.269	1.437	0.563	1.774	0.226	0.96	1.04
Feline_chaphamaparvovirus-OP499830.1-China-2022-cat	1.244	0.756	2.696	1.13	0.609	0.348	0.87	0.348	1.286	0.351	1.364	1.551	0.735	1.224	0.49	1.327	0.462	1.788	0.115	0.808	1.5	1.115	0.197	2.557	0.131	1.489	0.553	1.702	0.255	1.913	0.348	1.739	0	1.6	0.4	1.4	0.6	1.545	0.455	1.481	0.519	1.758	0.242	1.472	0.528	1.808	0.192	0.96	1.04
Feline_chaphamaparvovirus-OP499831.1-China-2022-cat	1.244	0.756	2.783	1.043	0.609	0.348	0.87	0.348	1.286	0.351	1.364	1.551	0.735	1.224	0.49	1.34	0.466	1.806	0.117	0.816	1.456	1.115	0.197	2.557	0.131	1.489	0.553	1.702	0.255	1.913	0.348	1.739	0	1.565	0.435	1.4	0.6	1.545	0.455	1.488	0.512	1.758	0.242	1.465	0.535	1.808	0.192	1	1
Feline_chaphamaparvovirus-OP499832.1-China-2022-cat	1.244	0.756	2.783	1.043	0.609	0.348	0.87	0.348	1.286	0.351	1.364	1.551	0.735	1.224	0.49	1.34	0.466	1.748	0.117	0.816	1.515	1.115	0.197	2.557	0.131	1.489	0.553	1.702	0.255	1.913	0.348	1.739	0	1.565	0.435	1.4	0.6	1.556	0.444	1.488	0.512	1.758	0.242	1.465	0.535	1.808	0.192	1	1
Feline_chaphamaparvovirus-OP499833.1-China-2022-cat	1.244	0.756	2.783	1.043	0.609	0.348	0.87	0.348	1.286	0.351	1.364	1.551	0.735	1.224	0.49	1.327	0.462	1.788	0.115	0.808	1.5	1.115	0.197	2.557	0.131	1.489	0.553	1.702	0.255	1.913	0.348	1.739	0	1.565	0.435	1.4	0.6	1.545	0.455	1.481	0.519	1.758	0.242	1.472	0.528	1.808	0.192	1	1
Carnivore_chapparvovirus-MK448316.1-USA-2018-dog	1.88	0.12	2.818	0.818	1.273	0.364	0.727	0	1.731	0.346	0.923	1.739	0.087	1.826	0.348	2.056	0.667	1.389	0.111	0.611	1.167	1.786	0.571	1.571	0.071	1.389	0.505	1.726	0.379	1.6	0.267	2	0.133	1.458	0.542	1.6	0.4	1.644	0.356	1.296	0.704	1.905	0.095	1.569	0.431	1.788	0.212	1.267	0.733
Carnivore_chapparvovirus-MT123283.1-China-2018-dog	1.833	0.167	2.687	0.716	1.433	0.358	0.806	0	1.64	0.36	1	1.826	0.087	1.652	0.435	2	0.686	1.371	0.171	0.629	1.143	1.745	0.655	1.527	0.073	1.432	0.547	1.726	0.295	1.639	0.328	1.902	0.131	1.556	0.444	1.6	0.4	1.556	0.444	1.306	0.694	1.839	0.161	1.556	0.444	1.761	0.239	1.2	0.8
Carnivore_chapparvovirus-MT123284.1-China-2019-dog	1.837	0.163	2.677	0.831	1.292	0.369	0.831	0	1.6	0.4	1	1.778	0.178	1.6	0.444	1.925	0.792	1.415	0.113	0.623	1.132	1.929	0.571	1.357	0.143	1.375	0.542	1.708	0.375	1.6	0.333	1.867	0.2	1.522	0.478	1.6	0.4	1.556	0.444	1.314	0.686	1.937	0.063	1.619	0.381	1.731	0.269	1.172	0.828
Carnivore_chapparvovirus-MT123285.1-China-2019-dog	1.84	0.16	2.906	0.75	1.219	0.375	0.75	0	1.622	0.405	0.973	1.702	0.255	1.702	0.34	2.075	0.673	1.402	0.112	0.617	1.121	1.895	0.632	1.333	0.14	1.375	0.583	1.667	0.375	1.533	0.333	1.867	0.267	1.556	0.444	1.533	0.467	1.636	0.364	1.304	0.696	1.905	0.095	1.569	0.431	1.788	0.212	1.31	0.69
Carnivore_chapparvovirus-MT123286.1-China-2019-dog	1.8	0.2	2.571	0.952	1.333	0.286	0.857	0	1.625	0.375	1	1.76	0.24	1.6	0.4	2.075	0.673	1.402	0.112	0.673	1.065	1.895	0.632	1.404	0.07	1.432	0.547	1.726	0.295	1.467	0.467	2	0.067	1.522	0.478	1.6	0.4	1.6	0.4	1.296	0.704	1.906	0.094	1.556	0.444	1.754	0.246	1.286	0.714
Carnivore_chapparvovirus-MT123287.1-China-2019-dog	1.84	0.16	2.667	0.857	1.333	0.286	0.857	0	1.64	0.4	0.96	1.532	0.255	1.787	0.426	2.057	0.629	1.371	0.171	0.629	1.143	1.931	0.69	1.31	0.069	1.389	0.547	1.726	0.337	1.533	0.4	1.933	0.133	1.522	0.478	1.6	0.4	1.556	0.444	1.314	0.686	1.905	0.095	1.587	0.413	1.781	0.219	1.214	0.786
Carnivore_chapparvovirus-MT710947.1-Italy-2019-dog	1.88	0.12	2.906	0.656	1.312	0.281	0.844	0	1.697	0.316	0.987	1.739	0.087	1.826	0.348	2.038	0.679	1.302	0.226	0.623	1.132	1.714	0.643	1.5	0.143	1.404	0.553	1.787	0.255	1.6	0.267	2	0.133	1.478	0.522	1.6	0.4	1.644	0.356	1.343	0.657	1.905	0.095	1.562	0.438	1.758	0.242	1.2	0.8
Carnivore_chapparvovirus-MT710948.1-Italy-2019-dog	1.88	0.12	2.906	0.656	1.312	0.281	0.844	0	1.72	0.32	0.96	1.739	0.087	1.826	0.348	2.038	0.679	1.302	0.226	0.623	1.132	1.673	0.655	1.527	0.145	1.389	0.547	1.811	0.253	1.6	0.267	2	0.133	1.478	0.522	1.6	0.4	1.644	0.356	1.343	0.657	1.905	0.095	1.562	0.438	1.758	0.242	1.2	0.8
Carnivore_chapparvovirus-MN928790.1-China-2018-cat	1.837	0.163	2.906	0.656	1.312	0.281	0.75	0.094	1.622	0.405	0.973	1.652	0.174	1.739	0.435	2.075	0.673	1.402	0.112	0.617	1.121	1.857	0.643	1.357	0.143	1.417	0.542	1.708	0.333	1.6	0.333	1.933	0.133	1.511	0.489	1.6	0.4	1.609	0.391	1.324	0.676	1.875	0.125	1.556	0.444	1.727	0.273	1.226	0.774
Carnivore_chapparvovirus-MN928791.1-China-2019-cat	1.837	0.163	2.625	0.75	1.406	0.281	0.844	0.094	1.579	0.434	0.987	1.667	0.167	1.583	0.583	2.019	0.673	1.458	0.112	0.617	1.121	1.825	0.632	1.474	0.07	1.447	0.511	1.702	0.34	1.6	0.333	1.933	0.133	1.511	0.489	1.667	0.333	1.591	0.409	1.314	0.686	1.938	0.062	1.594	0.406	1.727	0.273	1.241	0.759
Carnivore_chapparvovirus-OK546100.1-Canada-2016-dog	1.84	0.16	2.719	0.844	1.312	0.281	0.844	0	1.697	0.355	0.947	1.739	0.087	1.652	0.522	1.981	0.736	1.358	0.17	0.623	1.132	1.786	0.643	1.5	0.071	1.389	0.547	1.726	0.337	1.6	0.333	1.867	0.2	1.522	0.478	1.613	0.387	1.644	0.356	1.333	0.667	1.905	0.095	1.569	0.431	1.758	0.242	1.2	0.8
Carnivore_chapparvovirus-OK546101.1-Canada-2009-dog	1.84	0.16	2.812	0.75	1.312	0.281	0.844	0	1.68	0.36	0.96	1.739	0.087	1.826	0.348	2.038	0.679	1.415	0.113	0.623	1.132	1.786	0.643	1.5	0.071	1.389	0.505	1.768	0.337	1.6	0.333	1.933	0.133	1.522	0.478	1.6	0.4	1.644	0.356	1.333	0.667	1.905	0.095	1.569	0.431	1.788	0.212	1.2	0.8
Carnivore_chapparvovirus-OK546102.1-Canada-2011-dog	1.72	0.28	2.476	0.952	1.333	0.19	0.667	0.381	1.56	0.52	0.92	1.667	0.25	1.75	0.333	1.8	0.655	1.745	0.055	0.655	1.091	1.714	0.429	1.643	0.214	1.319	0.553	1.915	0.213	1.517	0.138	2.138	0.207	1.478	0.522	1.517	0.483	1.652	0.348	1.425	0.575	1.841	0.159	1.484	0.516	1.758	0.242	1.133	0.867
Carnivore_chapparvovirus-OM640108.1-Canada-2014-dog	1.84	0.16	2.812	0.75	1.406	0.188	0.844	0	1.618	0.395	0.987	1.778	0.089	1.778	0.356	2.038	0.679	1.415	0.113	0.623	1.132	1.857	0.571	1.429	0.143	1.375	0.583	1.792	0.25	1.627	0.271	1.966	0.136	1.511	0.489	1.677	0.323	1.644	0.356	1.333	0.667	1.905	0.095	1.581	0.419	1.788	0.212	1.2	0.8
Carnivore_chapparvovirus-OM640109.1-Canada-2014-dog	1.68	0.32	3.048	0.476	1.429	0.095	0.762	0.19	1.4	0.6	1	1.702	0.255	1.702	0.34	1.706	0.771	1.706	0.11	0.55	1.156	1.643	0.5	1.643	0.214	1.217	0.609	1.957	0.217	1.533	0.2	1.933	0.333	1.565	0.435	1.6	0.4	1.609	0.391	1.417	0.583	1.902	0.098	1.516	0.484	1.788	0.212	1.2	0.8
[truncated: 10 more columns]

## Sheet: CAI Comp Seq
CAI of Complete Sequence
Name	CAI-dog	CAI-cat	CAI-Sarcophilus harrisii	CAI-Chiroptera	CAI-Manis	CAI-Mus musculus	CAI-Ursus	CAI-Macaca fascicularis	CAI-Macaca mulatta	CAI-homo
Feline_chaphamaparvovirus-MN396757.1-Canada-2018-cat	0.763	0.71	0.85	0.729	0.71	0.748	0.716	0.818	0.791	0.801
Feline_chaphamaparvovirus-MN794869.1-USA-2019-cat	0.761	0.708	0.848	0.727	0.707	0.746	0.713	0.815	0.788	0.799
Feline_chaphamaparvovirus-MW404251.1-Italy-2019-cat	0.763	0.71	0.847	0.729	0.709	0.747	0.716	0.817	0.79	0.8
Feline_chaphamaparvovirus-MW404252.1-Italy-2019-cat	0.763	0.71	0.85	0.729	0.71	0.748	0.716	0.817	0.79	0.801
Feline_chaphamaparvovirus-MW404253.1-Italy-2019-cat	0.762	0.709	0.848	0.728	0.709	0.746	0.715	0.816	0.789	0.8
Feline_chaphamaparvovirus-MT708230.1-China-2019-cat	0.762	0.708	0.852	0.728	0.708	0.748	0.714	0.817	0.79	0.801
Feline_chaphamaparvovirus-MT708231.1-China-2019-cat	0.763	0.71	0.851	0.729	0.71	0.749	0.715	0.818	0.791	0.802
Feline_chaphamaparvovirus-MZ031965.1-China-2020-cat	0.762	0.708	0.852	0.728	0.708	0.747	0.714	0.817	0.79	0.801
Feline_chaphamaparvovirus-MZ031966.1-China-2020-cat	0.764	0.71	0.851	0.73	0.71	0.749	0.716	0.818	0.791	0.802
Feline_chaphamaparvovirus-OP499830.1-China-2022-cat	0.763	0.709	0.851	0.728	0.709	0.748	0.715	0.817	0.79	0.801
Feline_chaphamaparvovirus-OP499831.1-China-2022-cat	0.762	0.709	0.85	0.728	0.709	0.747	0.715	0.817	0.79	0.801
Feline_chaphamaparvovirus-OP499832.1-China-2022-cat	0.762	0.708	0.85	0.728	0.708	0.747	0.714	0.817	0.789	0.8
Feline_chaphamaparvovirus-OP499833.1-China-2022-cat	0.762	0.709	0.85	0.728	0.709	0.747	0.715	0.817	0.79	0.801
Carnivore_chapparvovirus-MK448316.1-USA-2018-dog	0.748	0.694	0.846	0.713	0.692	0.735	0.7	0.806	0.776	0.787
Carnivore_chapparvovirus-MT123283.1-China-2018-dog	0.748	0.694	0.846	0.713	0.693	0.736	0.7	0.805	0.776	0.787
Carnivore_chapparvovirus-MT123284.1-China-2019-dog	0.748	0.695	0.845	0.714	0.693	0.735	0.701	0.805	0.776	0.787
Carnivore_chapparvovirus-MT123285.1-China-2019-dog	0.747	0.695	0.843	0.713	0.693	0.734	0.7	0.804	0.775	0.786
Carnivore_chapparvovirus-MT123286.1-China-2019-dog	0.751	0.697	0.849	0.716	0.695	0.739	0.702	0.808	0.779	0.79
Carnivore_chapparvovirus-MT123287.1-China-2019-dog	0.749	0.696	0.846	0.715	0.694	0.737	0.701	0.806	0.777	0.788
Carnivore_chapparvovirus-MT710947.1-Italy-2019-dog	0.746	0.692	0.844	0.711	0.69	0.733	0.697	0.803	0.774	0.785
Carnivore_chapparvovirus-MT710948.1-Italy-2019-dog	0.745	0.691	0.844	0.71	0.69	0.732	0.697	0.802	0.773	0.784
Carnivore_chapparvovirus-MN928790.1-China-2018-cat	0.75	0.697	0.847	0.715	0.695	0.737	0.702	0.807	0.778	0.789
Carnivore_chapparvovirus-MN928791.1-China-2019-cat	0.749	0.696	0.848	0.715	0.694	0.737	0.701	0.807	0.778	0.789
Carnivore_chapparvovirus-OK546100.1-Canada-2016-dog	0.749	0.696	0.846	0.715	0.694	0.736	0.701	0.806	0.778	0.788
Carnivore_chapparvovirus-OK546101.1-Canada-2009-dog	0.748	0.694	0.847	0.713	0.692	0.735	0.699	0.805	0.776	0.787
Carnivore_chapparvovirus-OK546102.1-Canada-2011-dog	0.753	0.699	0.849	0.718	0.698	0.74	0.704	0.81	0.781	0.792
Carnivore_chapparvovirus-OM640108.1-Canada-2014-dog	0.749	0.695	0.848	0.714	0.693	0.736	0.7	0.807	0.777	0.788
Carnivore_chapparvovirus-OM640109.1-Canada-2014-dog	0.747	0.694	0.843	0.713	0.692	0.734	0.699	0.804	0.775	0.786
RCID of complete sequence
NAME	RCDIcanis	RCDIfelis catus	RCDIsarcophilus harrisii	RCDIchiroptera	RCDImanis	RCDImus musculus	RCDIursus	RCDImacaca fascicularis	RCDImacaca mulatta	RCDIhomo
Carnivore_chapparvovirus-MK448316.1-USA-2018-dog	1.628	1.712	1.397	1.679	1.73	1.658	1.706	1.545	1.59	1.575
Carnivore_chapparvovirus-MN928790.1-China-2018-cat	1.6	1.683	1.374	1.651	1.7	1.631	1.677	1.52	1.563	1.549
Carnivore_chapparvovirus-MN928791.1-China-2019-cat	1.583	1.664	1.362	1.633	1.679	1.61	1.658	1.504	1.546	1.532
Carnivore_chapparvovirus-MT123283.1-China-2018-dog	1.591	1.673	1.367	1.642	1.69	1.619	1.667	1.511	1.555	1.54
Carnivore_chapparvovirus-MT123284.1-China-2019-dog	1.583	1.663	1.364	1.632	1.68	1.612	1.658	1.505	1.547	1.533
Carnivore_chapparvovirus-MT123285.1-China-2019-dog	1.602	1.684	1.378	1.653	1.703	1.635	1.678	1.523	1.566	1.552
Carnivore_chapparvovirus-MT123286.1-China-2019-dog	1.582	1.663	1.361	1.632	1.679	1.608	1.658	1.503	1.546	1.531
Carnivore_chapparvovirus-MT123287.1-China-2019-dog	1.585	1.666	1.364	1.635	1.682	1.612	1.661	1.506	1.549	1.534
Carnivore_chapparvovirus-MT710947.1-Italy-2019-dog	1.631	1.716	1.398	1.683	1.734	1.663	1.71	1.548	1.593	1.578
Carnivore_chapparvovirus-MT710948.1-Italy-2019-dog	1.634	1.719	1.401	1.686	1.737	1.665	1.713	1.551	1.596	1.581
Carnivore_chapparvovirus-OK546100.1-Canada-2016-dog	1.591	1.672	1.369	1.641	1.689	1.621	1.667	1.512	1.555	1.54
Carnivore_chapparvovirus-OK546101.1-Canada-2009-dog	1.62	1.705	1.39	1.672	1.722	1.651	1.699	1.539	1.583	1.568
Carnivore_chapparvovirus-OK546102.1-Canada-2011-dog	1.566	1.648	1.349	1.616	1.66	1.592	1.643	1.487	1.529	1.514
Carnivore_chapparvovirus-OM640108.1-Canada-2014-dog	1.621	1.705	1.39	1.673	1.722	1.651	1.7	1.539	1.583	1.568
Carnivore_chapparvovirus-OM640109.1-Canada-2014-dog	1.618	1.703	1.388	1.67	1.72	1.651	1.697	1.536	1.58	1.565
Feline_chaphamaparvovirus-MN396757.1-Canada-2018-cat	1.596	1.68	1.381	1.647	1.694	1.62	1.672	1.518	1.562	1.543
Feline_chaphamaparvovirus-MN794869.1-USA-2019-cat	1.613	1.699	1.394	1.666	1.715	1.64	1.692	1.534	1.58	1.56
Feline_chaphamaparvovirus-MT708230.1-China-2019-cat	1.612	1.698	1.391	1.664	1.712	1.638	1.691	1.532	1.577	1.557
Feline_chaphamaparvovirus-MT708231.1-China-2019-cat	1.586	1.671	1.372	1.638	1.684	1.61	1.663	1.509	1.553	1.533
Feline_chaphamaparvovirus-MW404251.1-Italy-2019-cat	1.589	1.672	1.378	1.64	1.687	1.616	1.665	1.513	1.556	1.537
Feline_chaphamaparvovirus-MW404252.1-Italy-2019-cat	1.607	1.692	1.389	1.659	1.708	1.635	1.684	1.528	1.573	1.554
Feline_chaphamaparvovirus-MW404253.1-Italy-2019-cat	1.603	1.687	1.387	1.654	1.703	1.632	1.679	1.525	1.57	1.55
Feline_chaphamaparvovirus-MZ031965.1-China-2020-cat	1.631	1.719	1.407	1.684	1.734	1.659	1.711	1.55	1.597	1.576
Feline_chaphamaparvovirus-MZ031966.1-China-2020-cat	1.597	1.682	1.381	1.648	1.696	1.622	1.674	1.519	1.563	1.544
Feline_chaphamaparvovirus-OP499830.1-China-2022-cat	1.609	1.695	1.39	1.662	1.71	1.637	1.687	1.53	1.575	1.555
Feline_chaphamaparvovirus-OP499831.1-China-2022-cat	1.617	1.704	1.395	1.67	1.72	1.646	1.696	1.537	1.583	1.563
Feline_chaphamaparvovirus-OP499832.1-China-2022-cat	1.615	1.702	1.394	1.668	1.718	1.644	1.694	1.535	1.581	1.561
Feline_chaphamaparvovirus-OP499833.1-China-2022-cat	1.615	1.701	1.394	1.667	1.717	1.643	1.693	1.535	1.58	1.56
SiD of complete sequence
	Sidcanis	Sidfelis catus	sIDsarcophilus harrisii	SiDchiroptera	SiDmanis	SiDmus musculus	SiDursus	SiDmacaca fascicularis	SiDmacaca mulatta	SiDhomo
Feline_chaphamaparvovirus-MN396757.1-Canada-2018-cat	0.135482	0.149341	0.0925888	0.173271	0.150962	0.133136	0.14756	0.120829	0.129237	0.125778
Feline_chaphamaparvovirus-MN794869.1-USA-2019-cat	0.136818	0.150712	0.0937483	0.174963	0.152372	0.134695	0.148944	0.122121	0.130564	0.127177
Feline_chaphamaparvovirus-MW404251.1-Italy-2019-cat	0.13374	0.147429	0.091534	0.171316	0.149087	0.131623	0.145658	0.119271	0.127588	0.124195
Feline_chaphamaparvovirus-MW404252.1-Italy-2019-cat	0.135688	0.149442	0.0932009	0.173394	0.151078	0.133607	0.147672	0.12123	0.129559	0.126126
Feline_chaphamaparvovirus-MW404253.1-Italy-2019-cat	0.135105	0.148861	0.0923068	0.173083	0.150583	0.133092	0.147044	0.120512	0.128887	0.125552
Feline_chaphamaparvovirus-MT708230.1-China-2019-cat	0.134933	0.148971	0.0919676	0.172871	0.150367	0.13268	0.147169	0.120175	0.128611	0.125294
Feline_chaphamaparvovirus-MT708231.1-China-2019-cat	0.133704	0.14767	0.0908781	0.171581	0.149071	0.131455	0.145894	0.119065	0.127442	0.12401
Feline_chaphamaparvovirus-MZ031965.1-China-2020-cat	0.138091	0.15218	0.0946359	0.176408	0.15367	0.135868	0.150381	0.123189	0.131712	0.128183
Feline_chaphamaparvovirus-MZ031966.1-China-2020-cat	0.135379	0.149295	0.0926154	0.173231	0.150792	0.133042	0.147517	0.120717	0.129122	0.125656
Feline_chaphamaparvovirus-OP499830.1-China-2022-cat	0.134819	0.148858	0.0916643	0.173105	0.150342	0.132659	0.147069	0.120011	0.12849	0.12508
Feline_chaphamaparvovirus-OP499831.1-China-2022-cat	0.135761	0.149812	0.0925566	0.174143	0.151303	0.133606	0.148008	0.120932	0.129427	0.126013
Feline_chaphamaparvovirus-OP499832.1-China-2022-cat	0.135291	0.149306	0.0922059	0.173581	0.150795	0.133135	0.14751	0.120504	0.128975	0.125579
Feline_chaphamaparvovirus-OP499833.1-China-2022-cat	0.135346	0.14937	0.0922483	0.173651	0.15085	0.133188	0.147574	0.120545	0.129019	0.125619
Carnivore_chapparvovirus-MK448316.1-USA-2018-dog	0.133138	0.147345	0.0866626	0.170849	0.149219	0.13192	0.145947	0.117515	0.126077	0.124787
Carnivore_chapparvovirus-MT123283.1-China-2018-dog	0.128735	0.142934	0.0824878	0.166132	0.144865	0.127668	0.141473	0.113261	0.121773	0.120393
Carnivore_chapparvovirus-MT123284.1-China-2019-dog	0.126849	0.140745	0.0812173	0.16389	0.142766	0.125839	0.139355	0.111629	0.119969	0.118733
Carnivore_chapparvovirus-MT123285.1-China-2019-dog	0.128898	0.142612	0.083788	0.165884	0.144718	0.128217	0.141292	0.113909	0.122186	0.120984
Carnivore_chapparvovirus-MT123286.1-China-2019-dog	0.126203	0.140323	0.0801002	0.163663	0.142294	0.125174	0.138959	0.110773	0.119247	0.117839
Carnivore_chapparvovirus-MT123287.1-China-2019-dog	0.126987	0.141051	0.0811291	0.164426	0.143055	0.126062	0.139643	0.11175	0.120177	0.118857
Carnivore_chapparvovirus-MT710947.1-Italy-2019-dog	0.133764	0.147981	0.0875449	0.171556	0.14984	0.132863	0.146586	0.11831	0.126828	0.12556
Carnivore_chapparvovirus-MT710948.1-Italy-2019-dog	0.134346	0.148578	0.0879701	0.172142	0.150425	0.133385	0.147178	0.118836	0.127372	0.126088
Carnivore_chapparvovirus-MN928790.1-China-2018-cat	0.128432	0.142391	0.0831368	0.16546	0.144276	0.127542	0.140979	0.11326	0.121602	0.120334
Carnivore_chapparvovirus-MN928791.1-China-2019-cat	0.124925	0.139036	0.0793436	0.162022	0.140798	0.123851	0.137633	0.109602	0.117961	0.116706
Carnivore_chapparvovirus-OK546100.1-Canada-2016-dog	0.126793	0.140843	0.0811514	0.164285	0.142748	0.125918	0.13948	0.11154	0.119943	0.118648
Carnivore_chapparvovirus-OK546101.1-Canada-2009-dog	0.131393	0.145604	0.0852236	0.169149	0.147415	0.130435	0.144248	0.11595	0.124452	0.123098
Carnivore_chapparvovirus-OK546102.1-Canada-2011-dog	0.122329	0.136424	0.0777412	0.1594	0.137733	0.120963	0.134997	0.106957	0.115275	0.113643
Carnivore_chapparvovirus-OM640108.1-Canada-2014-dog	0.131905	0.146192	0.0855622	0.169703	0.147915	0.130907	0.144836	0.116398	0.124913	0.123552
Carnivore_chapparvovirus-OM640109.1-Canada-2014-dog	0.131218	0.145147	0.0863873	0.168469	0.146816	0.130165	0.143749	0.116067	0.124357	0.122638

## Sheet: eCAI and nCAI
Name	CAI-dog	eCAI-dog	Normalised CAI values-dog	CAI-cat	eCAI-cat	Normalised CAI values-cat
Feline_chaphamaparvovirus-MN396757.1-Canada-2018-cat	0.763	0.769	0.992198	0.71	0.71	1
Feline_chaphamaparvovirus-MN794869.1-USA-2019-cat	0.761	0.769	0.989597	0.708	0.713	0.992987
Feline_chaphamaparvovirus-MW404251.1-Italy-2019-cat	0.763	0.775	0.984516	0.71	0.733	0.968622
Feline_chaphamaparvovirus-MW404252.1-Italy-2019-cat	0.763	0.773	0.987063	0.71	0.713	0.995792
Feline_chaphamaparvovirus-MW404253.1-Italy-2019-cat	0.762	0.77	0.98961	0.709	0.717	0.988842
Feline_chaphamaparvovirus-MT708230.1-China-2019-cat	0.762	0.767	0.993481	0.708	0.715	0.99021
Feline_chaphamaparvovirus-MT708231.1-China-2019-cat	0.763	0.767	0.994785	0.71	0.714	0.994398
Feline_chaphamaparvovirus-MZ031965.1-China-2020-cat	0.762	0.768	0.992188	0.708	0.716	0.988827
Feline_chaphamaparvovirus-MZ031966.1-China-2020-cat	0.764	0.77	0.992208	0.71	0.713	0.995792
Feline_chaphamaparvovirus-OP499830.1-China-2022-cat	0.763	0.768	0.99349	0.709	0.715	0.991608
Feline_chaphamaparvovirus-OP499831.1-China-2022-cat	0.762	0.77	0.98961	0.709	0.712	0.995787
Feline_chaphamaparvovirus-OP499832.1-China-2022-cat	0.762	0.769	0.990897	0.708	0.716	0.988827
Feline_chaphamaparvovirus-OP499833.1-China-2022-cat	0.762	0.768	0.992188	0.709	0.715	0.991608
Feline_chaphamaparvovirus-OQ162042.1-2020-dog	0.761	0.77	0.988312	0.707	0.717	0.986053
Feline_chaphamaparvovirus-OQ162043.1-2020-dog	0.763	0.768	0.99349	0.709	0.716	0.990223
Carnivore_chapparvovirus-MK448316.1-USA-2018-dog	0.748	0.765	0.977778	0.694	0.708	0.980226
Carnivore_chapparvovirus-MT123283.1-China-2018-dog	0.748	0.764	0.979058	0.694	0.709	0.978843
Carnivore_chapparvovirus-MT123284.1-China-2019-dog	0.748	0.765	0.977778	0.695	0.711	0.977496
Carnivore_chapparvovirus-MT123285.1-China-2019-dog	0.747	0.765	0.976471	0.695	0.71	0.978873
Carnivore_chapparvovirus-MT123286.1-China-2019-dog	0.751	0.766	0.980418	0.697	0.708	0.984463
Carnivore_chapparvovirus-MT123287.1-China-2019-dog	0.749	0.766	0.977807	0.696	0.713	0.976157
Carnivore_chapparvovirus-MT710947.1-Italy-2019-dog	0.746	0.761	0.980289	0.692	0.708	0.977401
Carnivore_chapparvovirus-MT710948.1-Italy-2019-dog	0.745	0.763	0.976409	0.691	0.712	0.970506
Carnivore_chapparvovirus-MN928790.1-China-2018-cat	0.75	0.772	0.971503	0.697	0.716	0.973464
Carnivore_chapparvovirus-MN928791.1-China-2019-cat	0.749	0.768	0.97526	0.696	0.716	0.972067
Carnivore_chapparvovirus-OK546100.1-Canada-2016-dog	0.749	0.767	0.976532	0.696	0.713	0.976157
Carnivore_chapparvovirus-OK546101.1-Canada-2009-dog	0.748	0.764	0.979058	0.694	0.708	0.980226
Carnivore_chapparvovirus-OK546102.1-Canada-2011-dog	0.753	0.765	0.984314	0.699	0.712	0.981742
Carnivore_chapparvovirus-OM640108.1-Canada-2014-dog	0.749	0.763	0.981651	0.695	0.71	0.978873
Carnivore_chapparvovirus-OM640109.1-Canada-2014-dog	0.747	0.771	0.968872	0.694	0.716	0.969274
