# Supplementary material for: Phylogenetic Analysis and Codon Usage Bias Reveal the Potential of Feline and Canine Chaphamaparvovirus for Cross-species Transmission
Source: Preprints.org preprint supplement (doi:10.20944/preprints202306.0088.v1), 2023-06-01
Supplement: Supplementary file 2 [file Supplementary Table 1.xlsx]

## Sheet: Complete Seq
Accession No.	Name	Host	Country	Year	Subfamily
KM254174.1	Chicken chapparvovirus		South Korea	2013
KU563733.1	Porcine parvovirus 7	/Sus scrofa	USA	2015	Ungulate chaphamaparvovirus 1
KY312548.1	Parvoviridae sp.	China	red-crowned crane	2014
KY996756.1	Porcine parvovirus 7	Sus scrofa	China	2014	Ungulate chaphamaparvovirus 1
KY996757.1	Porcine parvovirus 7	Sus scrofa	China	2014	Ungulate chaphamaparvovirus 1
KY996758.1	Porcine parvovirus 7	Sus scrofa	China	2014	Ungulate chaphamaparvovirus 1
MF175078.2	Murine chapparvovirus	Mus musculus	USA	2014	Rodent chaphamaparvovirus 1
MG543456.1	Porcine parvovirus 7	Sus scrofa	China	2015	Ungulate chaphamaparvovirus 1
MG543457.1	Porcine parvovirus 7	Sus scrofa	China	2015	Ungulate chaphamaparvovirus 1
MG543458.1	Porcine parvovirus 7	Sus scrofa	China	2015	Ungulate chaphamaparvovirus 1
MG543459.1	Porcine parvovirus 7	Sus scrofa	China	2015	Ungulate chaphamaparvovirus 1
MG543460.1	Porcine parvovirus 7	Sus scrofa	China	2015	Ungulate chaphamaparvovirus 1
MG543461.1	Porcine parvovirus 7	Sus scrofa	China	2015	Ungulate chaphamaparvovirus 1
MG543462.1	Porcine parvovirus 7	Sus scrofa	China	2015	Ungulate chaphamaparvovirus 1
MG543463.1	Porcine parvovirus 7	Sus scrofa	China	2015	Ungulate chaphamaparvovirus 1
MG543464.1	Porcine parvovirus 7	Sus scrofa	China	2015	Ungulate chaphamaparvovirus 1
MG543465.1	Porcine parvovirus 7	Sus scrofa	China	2015	Ungulate chaphamaparvovirus 1
MG543466.1	Porcine parvovirus 7	Sus scrofa	China	2015	Ungulate chaphamaparvovirus 1
MG543467.1	Porcine parvovirus 7	Sus scrofa	China	2015	Ungulate chaphamaparvovirus 1
MG543468.1	Porcine parvovirus 7	Sus scrofa	China	2015	Ungulate chaphamaparvovirus 1
MG543469.1	Porcine parvovirus 7	Sus scrofa	China	2015	Ungulate chaphamaparvovirus 1
MG543470.1	Porcine parvovirus 7	Sus scrofa	China	2015	Ungulate chaphamaparvovirus 1
MG543471.1	Porcine parvovirus 7	Sus scrofa	China	2015	Ungulate chaphamaparvovirus 1
MG543472.1	Porcine parvovirus 7	Sus scrofa	China	2015	Ungulate chaphamaparvovirus 1
MG696111.1	Porcine parvovirus 7	Sus scrofa	China	2017	Ungulate chaphamaparvovirus 1
MG696112.1	Porcine parvovirus 7	Sus scrofa	China	2017	Ungulate chaphamaparvovirus 1
MG846442.1	Chicken chapparvovirus 2	Gallus gallus	Brazil	2015	Galliform chaphamaparvovirus 2
MG902949.1	Porcine parvovirus 7	Sus scrofa	Chna	2016	Ungulate chaphamaparvovirus 1
MG914435.1	Porcine parvovirus 7	Sus scrofa	Sweden	2016	Ungulate chaphamaparvovirus 1
MH422962.1	Porcine parvovirus 7	Sus scrofa	South Korea	2017	Ungulate chaphamaparvovirus 1
MH422963.1	Porcine parvovirus 7	Sus scrofa	South Korea	2017	Ungulate chaphamaparvovirus 1
MH422964.1	Porcine parvovirus 7	Sus scrofa	South Korea	2017	Ungulate chaphamaparvovirus 1
MH422965.1	Porcine parvovirus 7	Sus scrofa	South Korea	2017	Ungulate chaphamaparvovirus 1
MH422966.1	Porcine parvovirus 7	Sus scrofa	South Korea	2017	Ungulate chaphamaparvovirus 1
MH422967.1	Porcine parvovirus 7	Sus scrofa	South Korea	2017	Ungulate chaphamaparvovirus 1
MH670588.2	Mouse kidney parvovirus	Mus musculus	USA	2018	Rodent chaphamaparvovirus 1
MH817776.1	Porcine parvovirus 7	Sus scrofa	South Korea	2018	Ungulate chaphamaparvovirus 1
MH817777.1	Porcine parvovirus 7	Sus scrofa	South Korea	2018	Ungulate chaphamaparvovirus 1
MK092477.1	Porcine parvovirus 7	Sus scrofa	China	2015	Ungulate chaphamaparvovirus 1
MK092478.1	Porcine parvovirus 7	Sus scrofa	China	2015	Ungulate chaphamaparvovirus 1
MK092479.1	Porcine parvovirus 7	Sus scrofa	China	2015	Ungulate chaphamaparvovirus 1
MK092480.1	Porcine parvovirus 7	Sus scrofa	China	2015	Ungulate chaphamaparvovirus 1
MK092481.1	Porcine parvovirus 7	Sus scrofa	China	2015	Ungulate chaphamaparvovirus 1
MK092482.1	Porcine parvovirus 7	Sus scrofa	China	2015	Ungulate chaphamaparvovirus 1
MK092483.1	Porcine parvovirus 7	Sus scrofa	China	2015	Ungulate chaphamaparvovirus 1
MK092484.1	Porcine parvovirus 7	Sus scrofa	China	2015	Ungulate chaphamaparvovirus 1
MK092485.1	Porcine parvovirus 7	Sus scrofa	China	2015	Ungulate chaphamaparvovirus 1
MK092486.1	Porcine parvovirus 7	Sus scrofa	China	2015	Ungulate chaphamaparvovirus 1
MK092487.1	Porcine parvovirus 7	Sus scrofa	China	2015	Ungulate chaphamaparvovirus 1
MK092488.1	Porcine parvovirus 7	Sus scrofa	China	2015	Ungulate chaphamaparvovirus 1
MK092489.1	Porcine parvovirus 7	Sus scrofa	China	2015	Ungulate chaphamaparvovirus 1
MK092490.1	Porcine parvovirus 7	Sus scrofa	China	2015	Ungulate chaphamaparvovirus 1
MK092491.1	Porcine parvovirus 7	Sus scrofa	China	2015	Ungulate chaphamaparvovirus 1
MK092492.1	Porcine parvovirus 7	Sus scrofa	China	2015	Ungulate chaphamaparvovirus 1
MK092493.1	Porcine parvovirus 7	Sus scrofa	China	2015	Ungulate chaphamaparvovirus 1
MK092494.1	Porcine parvovirus 7	Sus scrofa	China	2015	Ungulate chaphamaparvovirus 1
MK092495.1	Porcine parvovirus 7	Sus scrofa	China	2015	Ungulate chaphamaparvovirus 1
MK092496.1	Porcine parvovirus 7	Sus scrofa	China	2015	Ungulate chaphamaparvovirus 1
MK378411.1	Porcine parvovirus 7	Sus scrofa	China	2017	Ungulate chaphamaparvovirus 1
MK448316.1	Cachavirus-1B	canine	USA	2018	Carnivore chaphamaparvovirus 1
MK484100.1	Porcine parvovirus 7	Sus scrofa	China	2018	Ungulate chaphamaparvovirus 1
MK484101.1	Porcine parvovirus 7	Sus scrofa	China	2018	Ungulate chaphamaparvovirus 1
MK484102.1	Porcine parvovirus 7	Sus scrofa	China	2018	Ungulate chaphamaparvovirus 1
MK513528.1	Tasmanian devil-associated chapparvovirus 1	Sarcophilus harrisii	Australia	2017	Dasyurid chaphamaparvovirus 1
MK513529.1	Tasmanian devil-associated chapparvovirus 2	Sarcophilus harrisii	Australia	2017	Dasyurid chaphamaparvovirus 2
MK513530.1	Tasmanian devil-associated chapparvovirus 3	Sarcophilus harrisii	Australia	2017
MK513531.1	Tasmanian devil-associated chapparvovirus 4	Sarcophilus harrisii	Australia	2017	Dasyurid chaphamaparvovirus 3
MK513532.1	Tasmanian devil-associated chapparvovirus 5	Sarcophilus harrisii	Australia	2017	Dasyurid chaphamaparvovirus
MK513533.1	Tasmanian devil-associated chapparvovirus 6	Sarcophilus harrisii	Australia	2017	Dasyurid chaphamaparvovirus 3
MK988619.1	Peafowl parvovirus 1	Pavo cristatus	China	2013	Galliform chaphamaparvovirus 4
MK988620.1	Peafowl parvovirus 2	Pavo cristatus	China	2013	Galliform chaphamaparvovirus 5
MN166196.1	Ursus americanus chapparvovirus	Ursus americanus	USA	2014
MN175613.1	Psittacara leucophthalmus chapparvovirus	Psittacara leucophthalmus	Brazil	2016	Psittacine chaphamaparvovirus 1
MN265364.1	Capuchin kidney parvovirus	Cebus capucinus imitator	Costa Rica	/	Primate chaphamaparvovirus 1
MN312221.1	Macaca fascicularis chapparvovirus	Macaca fascicularis	Thailand	2017
MN326243.1	Porcine parvovirus 7	Sus scrofa	China	1999	Ungulate chaphamaparvovirus 1
MN326244.1	Porcine parvovirus 7	Sus scrofa	China	1999	Ungulate chaphamaparvovirus 1
MN326245.1	Porcine parvovirus 7	Sus scrofa	China	2017	Ungulate chaphamaparvovirus 1
MN326246.1	Porcine parvovirus 7	Sus scrofa	China	1999	Ungulate chaphamaparvovirus 1
MN326247.1	Porcine parvovirus 7	Sus scrofa	China	2017	Ungulate chaphamaparvovirus 1
MN326248.1	Porcine parvovirus 7	Sus scrofa	China	2011	Ungulate chaphamaparvovirus 1
MN326249.1	Porcine parvovirus 7	Sus scrofa	China	2011	Ungulate chaphamaparvovirus 1
MN326250.1	Porcine parvovirus 7	Sus scrofa	China	2011	Ungulate chaphamaparvovirus 1
MN326251.1	Porcine parvovirus 7	Sus scrofa	China	1998	Ungulate chaphamaparvovirus 1
MN326252.1	Porcine parvovirus 7	Sus scrofa	China	1999	Ungulate chaphamaparvovirus 1
MN326253.1	Porcine parvovirus 7	Sus scrofa	China	1998	Ungulate chaphamaparvovirus 1
MN326254.1	Porcine parvovirus 7	Sus scrofa	China	2014	Ungulate chaphamaparvovirus 1
MN326255.1	Porcine parvovirus 7	Sus scrofa	China	2015	Ungulate chaphamaparvovirus 1
MN326256.1	Porcine parvovirus 7	Sus scrofa	China	2011	Ungulate chaphamaparvovirus 1
MN326257.1	Porcine parvovirus 7	Sus scrofa	China	2017	Ungulate chaphamaparvovirus 1
MN326258.1	Porcine parvovirus 7	Sus scrofa	China	2017	Ungulate chaphamaparvovirus 1
MN326259.1	Porcine parvovirus 7	Sus scrofa	China	2011	Ungulate chaphamaparvovirus 1
MN326260.1	Porcine parvovirus 7	Sus scrofa	China	2017	Ungulate chaphamaparvovirus 1
MN326261.1	Porcine parvovirus 7	Sus scrofa	China	2017	Ungulate chaphamaparvovirus 1
MN326262.1	Porcine parvovirus 7	Sus scrofa	China	1997	Ungulate chaphamaparvovirus 1
MN326263.1	Porcine parvovirus 7	Sus scrofa	China	2017	Ungulate chaphamaparvovirus 1
MN326264.1	Porcine parvovirus 7	Sus scrofa	China	2017	Ungulate chaphamaparvovirus 1
MN326265.1	Porcine parvovirus 7	Sus scrofa	China	2017	Ungulate chaphamaparvovirus 1
MN326266.1	Porcine parvovirus 7	Sus scrofa	China	2011	Ungulate chaphamaparvovirus 1
MN326267.1	Porcine parvovirus 7	Sus scrofa	China	2011	Ungulate chaphamaparvovirus 1
MN326268.1	Porcine parvovirus 7	Sus scrofa	China	2011	Ungulate chaphamaparvovirus 1
MN326269.1	Porcine parvovirus 7	Sus scrofa	China	2011	Ungulate chaphamaparvovirus 1
MN326270.1	Porcine parvovirus 7	Sus scrofa	China	2011	Ungulate chaphamaparvovirus 1
MN326271.1	Porcine parvovirus 7	Sus scrofa	China	1999	Ungulate chaphamaparvovirus 1
MN326272.1	Porcine parvovirus 7	Sus scrofa	China	1998	Ungulate chaphamaparvovirus 1
MN326273.1	Porcine parvovirus 7	Sus scrofa	China	1998	Ungulate chaphamaparvovirus 1
MN326274.1	Porcine parvovirus 7	Sus scrofa	China	1998	Ungulate chaphamaparvovirus 1
MN326275.1	Porcine parvovirus 7	Sus scrofa	China	1998	Ungulate chaphamaparvovirus 1
MN326276.1	Porcine parvovirus 7	Sus scrofa	China	2017	Ungulate chaphamaparvovirus 1
MN326277.1	Porcine parvovirus 7	Sus scrofa	China	1998	Ungulate chaphamaparvovirus 1
MN326278.1	Porcine parvovirus 7	Sus scrofa	China	2014	Ungulate chaphamaparvovirus 1
MN326279.1	Porcine parvovirus 7	Sus scrofa	China	1999	Ungulate chaphamaparvovirus 1
MN326280.1	Porcine parvovirus 7	Sus scrofa	China	1998	Ungulate chaphamaparvovirus 1
MN326281.1	Porcine parvovirus 7	Sus scrofa	China	2017	Ungulate chaphamaparvovirus 1
MN326282.1	Porcine parvovirus 7	Sus scrofa	China	2017	Ungulate chaphamaparvovirus 1
MN326283.1	Porcine parvovirus 7	Sus scrofa	China	1999	Ungulate chaphamaparvovirus 1
MN326284.1	Porcine parvovirus 7	Sus scrofa	China	2015	Ungulate chaphamaparvovirus 1
MN326285.1	Porcine parvovirus 7	Sus scrofa	China	2015	Ungulate chaphamaparvovirus 1
MN326286.1	Porcine parvovirus 7	Sus scrofa	China	1999	Ungulate chaphamaparvovirus 1
MN326287.1	Porcine parvovirus 7	Sus scrofa	China	1999	Ungulate chaphamaparvovirus 1
MN326288.1	Porcine parvovirus 7	Sus scrofa	China	1999	Ungulate chaphamaparvovirus 1
MN326289.1	Porcine parvovirus 7	Sus scrofa	China	2019	Ungulate chaphamaparvovirus 1
MN326290.1	Porcine parvovirus 7	Sus scrofa	China	2014	Ungulate chaphamaparvovirus 1
MN326291.1	Porcine parvovirus 7	Sus scrofa	China	2017	Ungulate chaphamaparvovirus 1
MN326292.1	Porcine parvovirus 7	Sus scrofa	China	1998	Ungulate chaphamaparvovirus 1
MN326293.1	Porcine parvovirus 7	Sus scrofa	China	2017	Ungulate chaphamaparvovirus 1
MN396757.1	Feline chaphamaparvovirus	feline	Canada	2018	Carnivore chaphamaparvovirus 1
MN515032.1	Porcine parvovirus 7	Sus scrofa	Brazil	2016	Ungulate chaphamaparvovirus 1
MN794869.1	Carnivore chapparvovirus 1	feline	USA	2019	Carnivore chaphamaparvovirus 1
MN928790.1	Chapparvovirus sp.	canine	China	2018	Carnivore chaphamaparvovirus 1
MN928791.1	Chapparvovirus sp.	canine	China	2019	Carnivore chaphamaparvovirus 1
MT093738.1	Mouse kidney parvovirus	Mus musculus	USA	2018	Rodent chaphamaparvovirus 1
MT123283.1	Chapparvovirus sp.	canine	China	2018	Carnivore chaphamaparvovirus 1
MT123284.1	Chapparvovirus sp.	canine	China	2019	Carnivore chaphamaparvovirus 1
MT123285.1	Chapparvovirus sp.	canine	China	2019	Carnivore chaphamaparvovirus 1
MT123286.1	Chapparvovirus sp.	canine	China	2019	Carnivore chaphamaparvovirus 1
MT123287.1	Chapparvovirus sp.	canine	China	2019	Carnivore chaphamaparvovirus 1
MT138270.1	Parvoviridae sp.	Psittacidae		2018
MT247744.1	Pacific black duck chaphamaparvovirus	Anas superciliosa	Australia	2018
MT247763.1	Chestnut teal chaphamaparvovirus	Anas castanea	Australia	2018
MT247818.1	Wood duck chaphamaparvovirus	Australia	Chenonetta jubata	2018
MT247822.1	Wood duck chaphamaparvovirus	Australia	Chenonetta jubata	2018
MT457858.1	Avian chapparvovirus		Australia	2013
MT708230.1	Feline chaphamaparvovirus	feline	China	2019	Carnivore chaphamaparvovirus 1
MT708231.1	Feline chaphamaparvovirus	feline	China	2019	Carnivore chaphamaparvovirus 1
MT710947.1	Carnivore chaphamaparvovirus 1	canine	Italy	2019	Carnivore chaphamaparvovirus 1
MT710948.1	Carnivore chaphamaparvovirus 1	canine	Italy	2019	Carnivore chaphamaparvovirus 1
MT734803.1	Bat chaphamaparvovirus	bat	USA	2020
MT747168.1	Porcine parvovirus 7	Sus scrofa	Colombia	2015	Ungulate chaphamaparvovirus 1
MT758695.1	Porcine parvovirus 7	Sus scrofa	Colombia	2019	Ungulate chaphamaparvovirus 1
MT758696.1	Porcine parvovirus 7	Sus scrofa	Colombia	2015	Ungulate chaphamaparvovirus 1
MT758697.1	Porcine parvovirus 7	Sus scrofa	Colombia	2015	Ungulate chaphamaparvovirus 1
MW046349.1	Pavo cristatus parvoviridae sp.	Pavo cristatus		2018
MW046569.1	Ara ararauna Chaphamaparvovirus	Ara ararauna		2018
MW046575.1	Cygnus atratus Chaphamaparvovirus	Cygnus atratus		2018
MW046636.1	Grus japonensis Chaphamaparvovirus	Grus japonensis	China	2018
MW051670.1	Porcine parvovirus 7	Sus scrofa	USA	2019	Ungulate chaphamaparvovirus 1
MW051671.1	Porcine parvovirus 7	Sus scrofa	USA	2018	Ungulate chaphamaparvovirus 1
MW306774.1	Duck-associated chapparvovirus 2	Canada	Anas rubripes	2015
MW306775.1	Duck-associated chapparvovirus 2	Canada	Anas rubripes	2015
MW306776.1	Duck-associated chapparvovirus 2	Canada	Anas rubripes	2015
MW306777.1	Duck-associated chapparvovirus 2	Canada	Anas rubripes	2015
MW306778.1	Duck-associated chapparvovirus 2	Canada	Anas rubripes	2015
MW306779.1	Galliform chaphamaparvovirus 3	Larus delawarensis	Canada	2015	Galliform chaphamaparvovirus 3
MW306791.1	Duck-associated chapparvovirus 2	Canada	Anas rubripes	2015
MW306794.1	Duck-associated chapparvovirus	Canada	Anas rubripes	2015
MW404251.1	Feline chaphamaparvovirus	feline	Italy	2019	Carnivore chaphamaparvovirus 1
MW404252.1	Feline chaphamaparvovirus	feline	Italy	2019	Carnivore chaphamaparvovirus 1
MW404253.1	Feline chaphamaparvovirus	feline	Italy	2019	Carnivore chaphamaparvovirus 1
MW404254.1	Feline chaphamaparvovirus	feline	Italy	2019	Carnivore chaphamaparvovirus 1
MW588074.1	Mute swan feces associated chapparvovirus 6	Mute swan	United Kingdom	2016
MW853958.1	Porcine parvovirus 7	Sus scrofa	China	2017-2018	Ungulate chaphamaparvovirus 1
MW853959.1	Porcine parvovirus 7	/Sus scrofa	China	2017-2018	Ungulate chaphamaparvovirus 1
MW853960.1	Porcine parvovirus 7	Sus scrofa	China	2017-2018	Ungulate chaphamaparvovirus 1
MW853961.1	Porcine parvovirus 7	/Sus scrofa	China	2017-2018	Ungulate chaphamaparvovirus 1
MW853962.1	Porcine parvovirus 7	/Sus scrofa	China	2017-2018	Ungulate chaphamaparvovirus 1
MZ031965.1	Feline chaphamaparvovirus	feline	China	2020	Carnivore chaphamaparvovirus 1
MZ031966.1	Feline chaphamaparvovirus	feline	China	2020	Carnivore chaphamaparvovirus 1
MZ364297.1	Psittacine parvovirus 1		Australia	2020
MZ577041.1	Porcine parvovirus 7	Sus scrofa	China	2017	Ungulate chaphamaparvovirus 1
MZ577042.1	Porcine parvovirus 7	Sus scrofa	China	2017	Ungulate chaphamaparvovirus 1
MZ577043.1	Porcine parvovirus 7	Sus scrofa	China	2018	Ungulate chaphamaparvovirus 1
MZ577044.1	Porcine parvovirus 7	Sus scrofa	China	2018	Ungulate chaphamaparvovirus 1
MZ577045.1	Porcine parvovirus 7	Sus scrofa	China	2019	Ungulate chaphamaparvovirus 1
MZ803107.1	Porcine parvovirus 7	Sus scrofa	China	2017	Ungulate chaphamaparvovirus 1
MZ846209.1	Porcine parvovirus 7	Sus scrofa	China	2017	Ungulate chaphamaparvovirus 1
MZ846210.1	Porcine parvovirus 7	Sus scrofa	China	2017	Ungulate chaphamaparvovirus 1
MZ846211.1	Porcine parvovirus 7	Sus scrofa	China	2017	Ungulate chaphamaparvovirus 1
MZ846212.1	Porcine parvovirus 7	Sus scrofa	China	2017	Ungulate chaphamaparvovirus 1
MZ846213.1	Porcine parvovirus 7	Sus scrofa	China	2017	Ungulate chaphamaparvovirus 1
NC_040843.1	Mouse kidney parvovirus	Mus musculus	Australia	2016	Rodent chaphamaparvovirus 1
NC_055465.1	Rat parvovirus 2	wild rat	China	2014	Rodent chaphamaparvovirus 2
OK334623.1	Myna chaphamaparvovirus	Acridotheres tristis	Australia	2019
OK546100.1	Carnivore chaphamaparvovirus 1	canine	Canada	2016	Carnivore chaphamaparvovirus 1
OK546101.1	Carnivore chaphamaparvovirus 1	canine	Canada	2009	Carnivore chaphamaparvovirus 1
OK546102.1	Carnivore chaphamaparvovirus 1	canine	Canada	2011	Carnivore chaphamaparvovirus 1
OL762454.1	Psittacine chaphamaparvovirus 2	Ninox boobook	Australia	2019
OM451162.1	Hedgehog chapparvovirus 6	amur hedgehog	China	2020
OM469025.1	Chaphamaparvovirus sp	Gallus gallus	Switzerland	2019
OM469026.1	Chaphamaparvovirus sp	Gallus gallus	Switzerland	2019
OM469027.1	Chaphamaparvovirus sp	Gallus gallus	Switzerland	2019	Galliform chaphamaparvovirus 3
OM469028.1	Chaphamaparvovirus sp	Gallus gallus	Switzerland	2019
OM469029.1	Chaphamaparvovirus sp	Gallus gallus	Switzerland	2019
OM469030.1	Chaphamaparvovirus sp	Gallus gallus	Netherlands	2019	Galliform chaphamaparvovirus 3
OM469031.1	Chaphamaparvovirus sp	Gallus gallus	Switzerland	2019
OM469032.1	Chaphamaparvovirus sp	Gallus gallus	Switzerland	2019	Galliform chaphamaparvovirus 3
OM469033.1	Chaphamaparvovirus sp	Gallus gallus	Switzerland	2019
OM469034.1	Chaphamaparvovirus sp	Gallus gallus	Switzerland	2019
OM469035.1	Chaphamaparvovirus sp	Gallus gallus	Switzerland	2019	Galliform chaphamaparvovirus 3
OM469036.1	Chaphamaparvovirus sp	Gallus gallus	Switzerland	2019
OM469037.1	Chaphamaparvovirus sp	Gallus gallus	Switzerland	2019
OM469038.1	Chaphamaparvovirus sp	Gallus gallus	Switzerland	2019	Galliform chaphamaparvovirus 3
OM469039.1	Chaphamaparvovirus sp	Gallus gallus	Switzerland	2019
OM469040.1	Chaphamaparvovirus sp	Gallus gallus	Switzerland	2019
OM469041.1	Chaphamaparvovirus sp	Gallus gallus	Switzerland	2019	Galliform chaphamaparvovirus 3
OM469042.1	Chaphamaparvovirus sp	Gallus gallus	Switzerland	2019
OM469043.1	Chaphamaparvovirus sp	Gallus gallus	Switzerland	2019
OM469044.1	Chaphamaparvovirus sp	Gallus gallus	Switzerland	2019	Galliform chaphamaparvovirus 3
OM469045.1	Chaphamaparvovirus sp	Gallus gallus	Switzerland	2019
OM469046.1	Chaphamaparvovirus sp	Gallus gallus	Switzerland	2019
OM469047.1	Chaphamaparvovirus sp	Gallus gallus	Switzerland	2019	Galliform chaphamaparvovirus 3
OM469048.1	Chaphamaparvovirus sp	Gallus gallus	Switzerland	2019
OM469049.1	Chaphamaparvovirus sp	Gallus gallus	Switzerland	2019
OM469050.1	Chaphamaparvovirus sp	Gallus gallus	Switzerland	2019	Galliform chaphamaparvovirus 3
OM469051.1	Chaphamaparvovirus sp	Gallus gallus	Switzerland	2019
OM469052.1	Chaphamaparvovirus sp	Gallus gallus	Switzerland	2019
OM469053.1	Chaphamaparvovirus sp	Gallus gallus	Switzerland	2019	Galliform chaphamaparvovirus 3
OM469054.1	Chaphamaparvovirus sp	Gallus gallus	Switzerland	2019
OM469055.1	Chaphamaparvovirus sp	Gallus gallus	Switzerland	2019	Galliform chaphamaparvovirus 3
OM469056.1	Chaphamaparvovirus sp	Gallus gallus	Switzerland	2019
OM469057.1	Chaphamaparvovirus sp	Gallus gallus	Switzerland	2019
OM469058.1	Chaphamaparvovirus sp	Gallus gallus	Switzerland	2019	Galliform chaphamaparvovirus 3
OM469059.1	Chaphamaparvovirus sp	Gallus gallus	Switzerland	2019
OM469060.1	Chaphamaparvovirus sp	Gallus gallus	Switzerland	2019
OM469061.1	Chaphamaparvovirus sp	Gallus gallus	Switzerland	2019	Galliform chaphamaparvovirus 3
OM469062.1	Chaphamaparvovirus sp	Gallus gallus	Switzerland	2019	Galliform chaphamaparvovirus 3
OM469063.1	Chaphamaparvovirus sp	Gallus gallus	Switzerland	2019
OM469064.1	Chaphamaparvovirus sp	Gallus gallus	Switzerland	2019	Galliform chaphamaparvovirus 3
OM469065.1	Chaphamaparvovirus sp	Gallus gallus	Switzerland	2019
OM469066.1	Chaphamaparvovirus sp	Gallus gallus	Switzerland	2019
OM469067.1	Chaphamaparvovirus sp	Gallus gallus	Switzerland	2019	Galliform chaphamaparvovirus 3
OM469068.1	Chaphamaparvovirus sp	Gallus gallus	Switzerland	2019
OM469069.1	Chaphamaparvovirus sp	Gallus gallus	Switzerland	2019
OM469070.1	Chaphamaparvovirus sp	Gallus gallus	Switzerland	2019	Galliform chaphamaparvovirus 3
OM469071.1	Chaphamaparvovirus sp	Gallus gallus	Switzerland	2019
OM469072.1	Chaphamaparvovirus sp	Gallus gallus	Switzerland	2019
OM469073.1	Chaphamaparvovirus sp	Gallus gallus	Switzerland	2019
OM469074.1	Chaphamaparvovirus sp	Gallus gallus	Switzerland	2019	Galliform chaphamaparvovirus 3
OM469075.1	Chaphamaparvovirus sp	Gallus gallus	Switzerland	2019
OM469076.1	Chaphamaparvovirus sp	Gallus gallus	Switzerland	2019
OM469077.1	Chaphamaparvovirus sp	Gallus gallus	Switzerland	2019	Galliform chaphamaparvovirus 3
OM469078.1	Chaphamaparvovirus sp	Gallus gallus	Switzerland	2019
OM469080.1	Chaphamaparvovirus sp	Gallus gallus	Switzerland	2019	Galliform chaphamaparvovirus 3
OM469081.1	Chaphamaparvovirus sp	Gallus gallus	Switzerland	2019
OM469082.1	Chaphamaparvovirus sp	Gallus gallus	Switzerland	2019
OM469083.1	Chaphamaparvovirus sp	Gallus gallus	Switzerland	2019	Galliform chaphamaparvovirus 3
OM469084.1	Chaphamaparvovirus sp	Gallus gallus	Switzerland	2019
OM469085.1	Chaphamaparvovirus sp	Gallus gallus	Switzerland	2019
OM469086.1	Chaphamaparvovirus sp	Gallus gallus	Switzerland	2019	Galliform chaphamaparvovirus 3
OM469087.1	Chaphamaparvovirus sp	Gallus gallus	Switzerland	2019
OM469088.1	Chaphamaparvovirus sp	Gallus gallus	Switzerland	2019
OM469089.1	Chaphamaparvovirus sp	Gallus gallus	Switzerland	2019	Galliform chaphamaparvovirus 3
OM469090.1	Chaphamaparvovirus sp	Gallus gallus	Switzerland	2019
OM469091.1	Chaphamaparvovirus sp	Gallus gallus	Switzerland	2019
OM469092.1	Chaphamaparvovirus sp	Gallus gallus	Switzerland	2019	Galliform chaphamaparvovirus 3
OM469093.1	Chaphamaparvovirus sp	Gallus gallus	Switzerland	2019
OM469094.1	Chaphamaparvovirus sp	Gallus gallus	Switzerland	2019	Galliform chaphamaparvovirus 3
OM469095.1	Chaphamaparvovirus sp	Gallus gallus	Switzerland	2019	Galliform chaphamaparvovirus 3
OM469096.1	Chaphamaparvovirus sp	Gallus gallus	Switzerland	2019
OM469097.1	Chaphamaparvovirus sp	Gallus gallus	Switzerland	2019
OM469098.1	Chaphamaparvovirus sp	Gallus gallus	Switzerland	2019	Galliform chaphamaparvovirus 3
OM469100.1	Chaphamaparvovirus sp	Gallus gallus	Switzerland	2019
OM469101.1	Chaphamaparvovirus sp	Gallus gallus	Switzerland	2019
OM469102.1	Chaphamaparvovirus sp	Gallus gallus	Switzerland	2019
OM469103.1	Chaphamaparvovirus sp	Gallus gallus	Switzerland	2019
OM469104.1	Chaphamaparvovirus sp	Gallus gallus	Switzerland	2019
OM469105.1	Chaphamaparvovirus sp	Gallus gallus	Switzerland	2019	Galliform chaphamaparvovirus 3
OM469106.1	Chaphamaparvovirus sp	Gallus gallus	Switzerland	2019
OM469107.1	Chaphamaparvovirus sp	Gallus gallus	Switzerland	2019
OM469108.1	Chaphamaparvovirus sp	Gallus gallus	Switzerland	2019	Galliform chaphamaparvovirus 3
OM469109.1	Chaphamaparvovirus sp	Gallus gallus	Switzerland	2019
OM469110.1	Chaphamaparvovirus sp	Gallus gallus	Switzerland	2019
OM469111.1	Chaphamaparvovirus sp	Gallus gallus	Switzerland	2019	Galliform chaphamaparvovirus 3
OM469112.1	Chaphamaparvovirus sp	Gallus gallus	Switzerland	2019
OM469113.1	Chaphamaparvovirus sp	Gallus gallus	Switzerland	2019	Galliform chaphamaparvovirus 3
OM469114.1	Chaphamaparvovirus sp	Gallus gallus	Switzerland	2019
OM469115.1	Chaphamaparvovirus sp	Gallus gallus	Switzerland	2019
OM469116.1	Chaphamaparvovirus sp	Gallus gallus	Switzerland	2019	Galliform chaphamaparvovirus 3
OM469117.1	Chaphamaparvovirus sp	Gallus gallus	Switzerland	2019
OM469118.1	Chaphamaparvovirus sp	Gallus gallus	Switzerland	2019
OM469119.1	Chaphamaparvovirus sp	Gallus gallus	Switzerland	2019	Galliform chaphamaparvovirus 3
OM469120.1	Chaphamaparvovirus sp	Gallus gallus	Switzerland	2019
OM469121.1	Chaphamaparvovirus sp	Gallus gallus	Switzerland	2019	Galliform chaphamaparvovirus 3
OM480517.1	Bamboo rat chapparvovirus	Hoary bamboo rat	China	2020
OM640108.1	Carnivore chaphamaparvovirus 1	canine	Canada	2014	Carnivore chaphamaparvovirus 1
OM640109.1	Carnivore chaphamaparvovirus 1	canine	Canada	2014	Carnivore chaphamaparvovirus 1
OM920501.1	Galliform chaphamaparvovirus 4	Gallus gallus	Australia	2021
OM920505.1	Galliform chaphamaparvovirus 8	Gallus gallus	Australia	2021
OM920509.1	Galliform chaphamaparvovirus 3	Gallus gallus	Australia	2021
OM920514.1	Galliform chaphamaparvovirus 16	Gallus gallus	Australia	2021
ON024116.1	Pangolin chaphamaparvovirus	pangolin	Chian	2018
ON024117.1	Pangolin chaphamaparvovirus	pangolin	Chian	2018
ON462331.1	Porcine parvovirus 7	Sus scrofa	China	2021	Ungulate chaphamaparvovirus 1
ON462332.1	Porcine parvovirus 7	Sus scrofa	China	2021	Ungulate chaphamaparvovirus 1
ON462333.1	Porcine parvovirus 7	Sus scrofa	China	2021	Ungulate chaphamaparvovirus 1
ON462334.1	Porcine parvovirus 7	Sus scrofa	China	2021	Ungulate chaphamaparvovirus 1
ON462335.1	Porcine parvovirus 7	Sus scrofa	China	2021	Ungulate chaphamaparvovirus 1
ON462336.1	Porcine parvovirus 7	Sus scrofa	China	2021	Ungulate chaphamaparvovirus 1
ON462337.1	Porcine parvovirus 7	Sus scrofa	China	2021	Ungulate chaphamaparvovirus 1
ON872777.1	Vulpes vulpes chaphamaparvovirus	Vulpes vulpes	China	2014
ON872778.1	Vulpes vulpes chaphamaparvovirus	Vulpes vulpes	Chian	2014	Galliform chaphamaparvovirus 3
OP264970.1	Chaphamaparvovirus sp	Gallus gallus	Netherlands	2019
OP264971.1	Chaphamaparvovirus sp	Gallus gallus	Netherlands	2019
OP264972.1	Chaphamaparvovirus sp	Gallus gallus	Netherlands	2019
OP264973.1	Chaphamaparvovirus sp	Gallus gallus	Netherlands	2019
OP264974.1	Chaphamaparvovirus sp	Gallus gallus	Netherlands	2019
OP264975.1	Chaphamaparvovirus sp	Gallus gallus	Netherlands	2019
OP264976.1	Chaphamaparvovirus sp	Gallus gallus	Netherlands	2019
OP264977.1	Chaphamaparvovirus sp	Gallus gallus	Netherlands	2019
OP264978.1	Chaphamaparvovirus sp	Gallus gallus	Netherlands	2019
OP264979.1	Chaphamaparvovirus sp	Gallus gallus	Netherlands	2019
OP264980.1	Chaphamaparvovirus sp	Gallus gallus	Netherlands	2019
OP264981.1	Chaphamaparvovirus sp	Gallus gallus	Netherlands	2019
OP264982.1	Chaphamaparvovirus sp	Gallus gallus	Netherlands	2019
OP264983.1	Chaphamaparvovirus sp	Gallus gallus	Netherlands	2019
OP264984.1	Chaphamaparvovirus sp	Gallus gallus	Netherlands	2019
OP264985.1	Chaphamaparvovirus sp	Gallus gallus	Netherlands	2019
OP264986.1	Chaphamaparvovirus sp	Gallus gallus	Netherlands	2019	Galliform chaphamaparvovirus 3
OP264987.1	Chaphamaparvovirus sp	Gallus gallus	Netherlands	2019	Galliform chaphamaparvovirus 3
OP264988.1	Chaphamaparvovirus sp	Gallus gallus	Netherlands	2019	Galliform chaphamaparvovirus 3
OP264989.1	Chaphamaparvovirus sp	Gallus gallus	Netherlands	2019	Galliform chaphamaparvovirus 3
OP264990.1	Chaphamaparvovirus sp	Gallus gallus	Netherlands	2019	Galliform chaphamaparvovirus 3
OP264991.1	Chaphamaparvovirus sp	Gallus gallus	Netherlands	2019	Galliform chaphamaparvovirus 3
OP264992.1	Chaphamaparvovirus sp	Gallus gallus	Netherlands	2019	Galliform chaphamaparvovirus 3
OP264993.1	Chaphamaparvovirus sp	Gallus gallus	Netherlands	2019	Galliform chaphamaparvovirus 3
OP264994.1	Chaphamaparvovirus sp	Gallus gallus	Netherlands	2019	Galliform chaphamaparvovirus 3
OP264995.1	Chaphamaparvovirus sp	Gallus gallus	Netherlands	2019	Galliform chaphamaparvovirus 3
OP264996.1	Chaphamaparvovirus sp	Gallus gallus	Netherlands	2019	Galliform chaphamaparvovirus 3
OP264997.1	Chaphamaparvovirus sp	Gallus gallus	Netherlands	2019	Galliform chaphamaparvovirus 3
OP264998.1	Chaphamaparvovirus sp	Gallus gallus	Netherlands	2019	Galliform chaphamaparvovirus 3
OP264999.1	Chaphamaparvovirus sp	Gallus gallus	Netherlands	2019	Galliform chaphamaparvovirus 3
OP265000.1	Chaphamaparvovirus sp	Gallus gallus	Netherlands	2019	Galliform chaphamaparvovirus 3
OP265001.1	Chaphamaparvovirus sp	Gallus gallus	Netherlands	2019	Galliform chaphamaparvovirus 3
OP265002.1	Chaphamaparvovirus sp	Gallus gallus	Netherlands	2019	Galliform chaphamaparvovirus 3
OP265003.1	Chaphamaparvovirus sp	Gallus gallus	Netherlands	2019	Galliform chaphamaparvovirus 3
OP499830.1	Feline chaphamaparvovirus	feline	China	2022	Carnivore chaphamaparvovirus 1
OP499831.1	Feline chaphamaparvovirus	feline	China	2022	Carnivore chaphamaparvovirus 1
OP499832.1	Feline chaphamaparvovirus	feline	China	2022	Carnivore chaphamaparvovirus 1
OP499833.1	Feline chaphamaparvovirus	feline	China	2022	Carnivore chaphamaparvovirus 1
MN939556.1	Chapparvovirus sp.	Human	Brazil	2014
