# Supplementary material for: Phylogenetic Analysis and Codon Usage Bias Reveal the Potential of Feline and Canine Chaphamaparvovirus for Cross-species Transmission
Source: Preprints.org preprint supplement (doi:10.20944/preprints202306.0088.v1), 2023-06-01
Supplement: Supplementary file 4 [file Supplementary Table 3.xlsx]

## Sheet: Codon usage analysis
NS Codon usage analysis
SEQUENCES \ PARAMETERS	length	A	C	T	G	%A	%C	%T	%G	%G+C	%G+A	%G+T	%A+T	%A+C	%C+T	A1	C1	T1	G1	%A1	%C1	%T1	%G1	%G1+C1	%G1+A1	%G1+T1	%A1+T1	%A1+C1	%C1+T1	A2	C2	T2	G2	%A2	%C2	%T2	%G2	%G2+C2	%G2+A2	%G2+T2	%A2+T2	%A2+C2	%C2+T2	A3	C3	T3	G3	%A3	%C3
Feline_chaphamaparvovirus-MN396757.1-Canada-2018-cat	1977	683	346	544	404	34.5473	17.5013	27.5164	20.435	37.9363	54.9823	47.9514	62.0637	52.0486	45.0177	242	151	95	171	36.7223	14.4158	22.9135	25.9484	40.3642	62.6707	48.8619	59.6358	51.1381	37.3293	211	163	139	146	32.0182	21.0926	24.7344	22.1548	43.2473	54.173	46.8892	56.7527	53.1108	45.827	230	230	112	87	34.9014	16.9954
Feline_chaphamaparvovirus-MN794869.1-USA-2019-cat	1989	688	344	550	407	34.5902	17.2951	27.6521	20.4625	37.7577	55.0528	48.1146	62.2423	51.8854	44.9472	241	154	94	174	36.3499	14.178	23.2278	26.2443	40.4223	62.5943	49.4721	59.5777	50.5279	37.4057	213	164	139	147	32.1267	20.9653	24.736	22.1719	43.1373	54.2986	46.908	56.8627	53.092	45.7014	234	232	111	86	35.2941	16.7421
Feline_chaphamaparvovirus-MW404251.1-Italy-2019-cat	1977	679	346	546	406	34.345	17.5013	27.6176	20.5362	38.0374	54.8811	48.1538	61.9626	51.8462	45.1189	240	152	94	173	36.4188	14.264	23.0653	26.2519	40.5159	62.6707	49.3171	59.4841	50.6829	37.3293	212	163	139	145	32.17	21.0926	24.7344	22.003	43.0956	54.173	46.7375	56.9044	53.2625	45.827	227	231	113	88	34.4461	17.1472
Feline_chaphamaparvovirus-MW404252.1-Italy-2019-cat	1977	686	348	543	400	34.699	17.6024	27.4659	20.2327	37.8351	54.9317	47.6985	62.1649	52.3015	45.0683	242	152	94	171	36.7223	14.264	23.0653	25.9484	40.2124	62.6707	49.0137	59.7876	50.9863	37.3293	212	163	139	145	32.17	21.0926	24.7344	22.003	43.0956	54.173	46.7375	56.9044	53.2625	45.827	232	228	115	84	35.2049	17.4507
Feline_chaphamaparvovirus-MW404253.1-Italy-2019-cat	1977	682	339	549	407	34.4967	17.1472	27.7693	20.5867	37.7339	55.0835	48.3561	62.2661	51.6439	44.9165	242	152	93	172	36.7223	14.1123	23.0653	26.1002	40.2124	62.8225	49.1654	59.7876	50.8346	37.1775	211	163	138	147	32.0182	20.9408	24.7344	22.3065	43.2473	54.3247	47.041	56.7527	52.959	45.6753	229	234	108	88	34.7496	16.3885
Feline_chaphamaparvovirus-MT708230.1-China-2019-cat	1977	678	339	550	410	34.2944	17.1472	27.8199	20.7385	37.8857	55.0329	48.5584	62.1143	51.4416	44.9671	237	151	94	177	35.9636	14.264	22.9135	26.8589	41.1229	62.8225	49.7724	58.8771	50.2276	37.1775	211	163	138	147	32.0182	20.9408	24.7344	22.3065	43.2473	54.3247	47.041	56.7527	52.959	45.6753	230	236	107	86	34.9014	16.2367
Feline_chaphamaparvovirus-MT708231.1-China-2019-cat	1977	673	343	549	412	34.0415	17.3495	27.7693	20.8397	38.1892	54.8811	48.609	61.8108	51.391	45.1189	238	151	95	175	36.1153	14.4158	22.9135	26.5554	40.9712	62.6707	49.4689	59.0288	50.5311	37.3293	210	165	138	146	31.8665	20.9408	25.0379	22.1548	43.0956	54.0212	47.1927	56.9044	52.8073	45.9788	225	233	110	91	34.1426	16.692
Feline_chaphamaparvovirus-MZ031965.1-China-2020-cat	1977	683	340	549	405	34.5473	17.1978	27.7693	20.4856	37.6834	55.0329	48.2549	62.3166	51.7451	44.9671	240	152	93	174	36.4188	14.1123	23.0653	26.4036	40.5159	62.8225	49.4689	59.4841	50.5311	37.1775	212	163	138	146	32.17	20.9408	24.7344	22.1548	43.0956	54.3247	46.8892	56.9044	53.1108	45.6753	231	234	109	85	35.0531	16.5402
Feline_chaphamaparvovirus-MZ031966.1-China-2020-cat	1977	679	345	546	407	34.345	17.4507	27.6176	20.5867	38.0374	54.9317	48.2044	61.9626	51.7956	45.0683	240	152	94	173	36.4188	14.264	23.0653	26.2519	40.5159	62.6707	49.3171	59.4841	50.6829	37.3293	211	163	139	146	32.0182	21.0926	24.7344	22.1548	43.2473	54.173	46.8892	56.7527	53.1108	45.827	228	231	112	88	34.5979	16.9954
Feline_chaphamaparvovirus-OP499830.1-China-2022-cat	1977	677	338	551	411	34.2438	17.0966	27.8705	20.7891	37.8857	55.0329	48.6596	62.1143	51.3404	44.9671	236	152	93	178	35.8118	14.1123	23.0653	27.0106	41.1229	62.8225	50.0759	58.8771	49.9241	37.1775	211	164	137	147	32.0182	20.7891	24.8862	22.3065	43.0956	54.3247	47.1927	56.9044	52.8073	45.6753	230	235	108	86	34.9014	16.3885
Feline_chaphamaparvovirus-OP499831.1-China-2022-cat	1977	680	337	551	409	34.3955	17.046	27.8705	20.6879	37.7339	55.0835	48.5584	62.2661	51.4416	44.9165	237	152	93	177	35.9636	14.1123	23.0653	26.8589	40.9712	62.8225	49.9241	59.0288	50.0759	37.1775	211	164	137	147	32.0182	20.7891	24.8862	22.3065	43.0956	54.3247	47.1927	56.9044	52.8073	45.6753	232	235	107	85	35.2049	16.2367
Feline_chaphamaparvovirus-OP499832.1-China-2022-cat	1977	679	338	551	409	34.345	17.0966	27.8705	20.6879	37.7845	55.0329	48.5584	62.2155	51.4416	44.9671	237	152	93	177	35.9636	14.1123	23.0653	26.8589	40.9712	62.8225	49.9241	59.0288	50.0759	37.1775	211	164	137	147	32.0182	20.7891	24.8862	22.3065	43.0956	54.3247	47.1927	56.9044	52.8073	45.6753	231	235	108	85	35.0531	16.3885
Feline_chaphamaparvovirus-OP499833.1-China-2022-cat	1977	678	338	551	410	34.2944	17.0966	27.8705	20.7385	37.8351	55.0329	48.609	62.1649	51.391	44.9671	236	152	93	178	35.8118	14.1123	23.0653	27.0106	41.1229	62.8225	50.0759	58.8771	49.9241	37.1775	211	164	137	147	32.0182	20.7891	24.8862	22.3065	43.0956	54.3247	47.1927	56.9044	52.8073	45.6753	231	235	108	85	35.0531	16.3885
Carnivore_chapparvovirus-MK448316.1-USA-2018-dog	1992	674	346	572	400	33.8353	17.3695	28.7149	20.0803	37.4498	53.9157	48.7952	62.5502	51.2048	46.0843	221	161	104	178	33.2831	15.6627	24.247	26.8072	42.4699	60.0904	51.0542	57.5301	48.9458	39.9096	214	163	142	145	32.2289	21.3855	24.5482	21.8373	43.2229	54.0663	46.3855	56.7771	53.6145	45.9337	239	248	100	77	35.994	15.0602
Carnivore_chapparvovirus-MT123283.1-China-2018-dog	1992	671	352	569	400	33.6847	17.6707	28.5643	20.0803	37.751	53.7651	48.6446	62.249	51.3554	46.2349	224	159	106	175	33.7349	15.9639	23.9458	26.3554	42.3193	60.0904	50.3012	57.6807	49.6988	39.9096	214	166	141	143	32.2289	21.2349	25	21.5361	42.7711	53.7651	46.5361	57.2289	53.4639	46.2349	233	244	105	82	35.0904	15.8133
Carnivore_chapparvovirus-MT123284.1-China-2019-dog	1992	669	355	566	402	33.5843	17.8213	28.4137	20.1807	38.002	53.7651	48.5944	61.998	51.4056	46.2349	223	159	107	175	33.5843	16.1145	23.9458	26.3554	42.4699	59.9398	50.3012	57.5301	49.6988	40.0602	212	164	143	145	31.9277	21.5361	24.6988	21.8373	43.3735	53.7651	46.5361	56.6265	53.4639	46.2349	234	243	105	82	35.241	15.8133
Carnivore_chapparvovirus-MT123285.1-China-2019-dog	1992	670	354	571	397	33.6345	17.7711	28.6647	19.9297	37.7008	53.5643	48.5944	62.2992	51.4056	46.4357	224	160	105	175	33.7349	15.8133	24.0964	26.3554	42.1687	60.0904	50.4518	57.8313	49.5482	39.9096	212	164	145	143	31.9277	21.8373	24.6988	21.5361	43.3735	53.4639	46.2349	56.6265	53.7651	46.5361	234	247	104	79	35.241	15.6627
Carnivore_chapparvovirus-MT123286.1-China-2019-dog	1992	672	355	569	396	33.7349	17.8213	28.5643	19.8795	37.7008	53.6145	48.4438	62.2992	51.5562	46.3855	225	159	106	174	33.8855	15.9639	23.9458	26.2048	42.1687	60.0904	50.1506	57.8313	49.8494	39.9096	213	165	144	142	32.0783	21.6867	24.8494	21.3855	43.0723	53.4639	46.2349	56.9277	53.7651	46.5361	234	245	105	80	35.241	15.8133
Carnivore_chapparvovirus-MT123287.1-China-2019-dog	1992	669	355	568	400	33.5843	17.8213	28.5141	20.0803	37.9016	53.6647	48.5944	62.0984	51.4056	46.3353	225	157	108	174	33.8855	16.2651	23.6446	26.2048	42.4699	60.0904	49.8494	57.5301	50.1506	39.9096	211	165	143	145	31.7771	21.5361	24.8494	21.8373	43.3735	53.6145	46.6867	56.6265	53.3133	46.3855	233	246	104	81	35.0904	15.6627
Carnivore_chapparvovirus-MT710947.1-Italy-2019-dog	1992	675	347	573	397	33.8855	17.4197	28.7651	19.9297	37.3494	53.8153	48.6948	62.6506	51.3052	46.1847	225	161	105	173	33.8855	15.8133	24.247	26.0542	41.8675	59.9398	50.3012	58.1325	49.6988	40.0602	213	165	142	144	32.0783	21.3855	24.8494	21.6867	43.0723	53.7651	46.5361	56.9277	53.4639	46.2349	237	247	100	80	35.6928	15.0602
Carnivore_chapparvovirus-MT710948.1-Italy-2019-dog	1992	675	345	574	398	33.8855	17.3193	28.8153	19.9799	37.2992	53.8655	48.7952	62.7008	51.2048	46.1345	225	161	105	173	33.8855	15.8133	24.247	26.0542	41.8675	59.9398	50.3012	58.1325	49.6988	40.0602	213	165	141	145	32.0783	21.2349	24.8494	21.8373	43.0723	53.9157	46.6867	56.9277	53.3133	46.0843	237	248	99	80	35.6928	14.9096
Carnivore_chapparvovirus-MN928790.1-China-2018-cat	1992	675	351	571	395	33.8855	17.6205	28.6647	19.8293	37.4498	53.7149	48.494	62.5502	51.506	46.2851	224	161	105	174	33.7349	15.8133	24.247	26.2048	42.0181	59.9398	50.4518	57.9819	49.5482	40.0602	214	165	142	143	32.2289	21.3855	24.8494	21.5361	42.9217	53.7651	46.3855	57.0783	53.6145	46.2349	237	245	104	78	35.6928	15.6627
Carnivore_chapparvovirus-MN928791.1-China-2019-cat	1992	670	351	570	401	33.6345	17.6205	28.6145	20.1305	37.751	53.7651	48.745	62.249	51.255	46.2349	222	158	107	177	33.4337	16.1145	23.7952	26.6566	42.7711	60.0904	50.4518	57.2289	49.5482	39.9096	213	166	142	143	32.0783	21.3855	25	21.5361	42.9217	53.6145	46.5361	57.0783	53.4639	46.3855	235	246	102	81	35.3916	15.3614
Carnivore_chapparvovirus-OK546100.1-Canada-2016-dog	1992	671	349	572	400	33.6847	17.5201	28.7149	20.0803	37.6004	53.7651	48.7952	62.3996	51.2048	46.2349	223	161	105	175	33.5843	15.8133	24.247	26.3554	42.1687	59.9398	50.6024	57.8313	49.3976	40.0602	214	165	142	143	32.2289	21.3855	24.8494	21.5361	42.9217	53.7651	46.3855	57.0783	53.6145	46.2349	234	246	102	82	35.241	15.3614
Carnivore_chapparvovirus-OK546101.1-Canada-2009-dog	1992	675	349	572	396	33.8855	17.5201	28.7149	19.8795	37.3996	53.7651	48.5944	62.6004	51.4056	46.2349	223	161	105	175	33.5843	15.8133	24.247	26.3554	42.1687	59.9398	50.6024	57.8313	49.3976	40.0602	213	165	142	144	32.0783	21.3855	24.8494	21.6867	43.0723	53.7651	46.5361	56.9277	53.4639	46.2349	239	246	102	77	35.994	15.3614
Carnivore_chapparvovirus-OK546102.1-Canada-2011-dog	1992	673	358	563	398	33.7851	17.9719	28.2631	19.9799	37.9518	53.7651	48.243	62.0482	51.757	46.2349	227	158	109	170	34.1867	16.4157	23.7952	25.6024	42.0181	59.7892	49.3976	57.9819	50.6024	40.2108	213	166	142	143	32.0783	21.3855	25	21.5361	42.9217	53.6145	46.5361	57.0783	53.4639	46.3855	233	239	107	85	35.0904	16.1145
Carnivore_chapparvovirus-OM640108.1-Canada-2014-dog	1992	675	349	573	395	33.8855	17.5201	28.7651	19.8293	37.3494	53.7149	48.5944	62.6506	51.4056	46.2851	226	160	106	172	34.0361	15.9639	24.0964	25.9036	41.8675	59.9398	50	58.1325	50	40.0602	213	165	142	144	32.0783	21.3855	24.8494	21.6867	43.0723	53.7651	46.5361	56.9277	53.4639	46.2349	236	248	101	79	35.5422	15.2108
Carnivore_chapparvovirus-OM640109.1-Canada-2014-dog	1992	679	355	564	394	34.0863	17.8213	28.3133	19.7791	37.6004	53.8655	48.0924	62.3996	51.9076	46.1345	224	159	108	173	33.7349	16.2651	23.9458	26.0542	42.3193	59.7892	50	57.6807	50	40.2108	213	166	142	143	32.0783	21.3855	25	21.5361	42.9217	53.6145	46.5361	57.0783	53.4639	46.3855	242	239	105	78	36.4458	15.8133
VP Codon usage analysis
SEQUENCES \ PARAMETERS	length	A	C	T	G	%A	%C	%T	%G	%G+C	%G+A	%G+T	%A+T	%A+C	%C+T	A1	C1	T1	G1	%A1	%C1	%T1	%G1	%G1+C1	%G1+A1	%G1+T1	%A1+T1	%A1+C1	%C1+T1	A2	C2	T2	G2	%A2	%C2	%T2	%G2	%G2+C2	%G2+A2	%G2+T2	%A2+T2	%A2+C2	%C2+T2	A3	C3	T3	G3	%A3	%C3
Feline_chaphamaparvovirus-MN396757.1-Canada-2018	1527	611	276	382	258	40.0131	18.0747	25.0164	16.8959	34.9705	56.909	41.9122	65.0295	58.0878	43.091	208	109	81	111	40.8644	15.9136	21.4145	21.8075	37.721	62.6719	43.222	62.279	56.778	37.3281	181	115	127	86	35.5599	24.9509	22.5933	16.8959	41.8468	52.4558	39.4892	58.1532	60.5108	47.5442	222	158	68	61	43.6149	13.3595
Feline_chaphamaparvovirus-MN794869.1-USA-2019	1527	612	275	381	259	40.0786	18.0092	24.9509	16.9614	34.9705	57.0399	41.9122	65.0295	58.0878	42.9601	207	109	81	112	40.668	15.9136	21.4145	22.0039	37.9175	62.6719	43.4185	62.0825	56.5815	37.3281	182	114	127	86	35.7564	24.9509	22.3969	16.8959	41.8468	52.6523	39.2927	58.1532	60.7073	47.3477	223	158	67	61	43.8114	13.1631
Feline_chaphamaparvovirus-MW404251.1-Italy-2019	1527	613	275	382	257	40.1441	18.0092	25.0164	16.8304	34.8396	56.9745	41.8468	65.1604	58.1532	43.0255	209	109	81	110	41.0609	15.9136	21.4145	21.611	37.5246	62.6719	43.0255	62.4754	56.9745	37.3281	182	115	127	85	35.7564	24.9509	22.5933	16.6994	41.6503	52.4558	39.2927	58.3497	60.7073	47.5442	222	158	67	62	43.6149	13.1631
Feline_chaphamaparvovirus-MW404252.1-Italy-2019	1527	612	276	383	256	40.0786	18.0747	25.0819	16.7649	34.8396	56.8435	41.8468	65.1604	58.1532	43.1565	209	109	81	110	41.0609	15.9136	21.4145	21.611	37.5246	62.6719	43.0255	62.4754	56.9745	37.3281	181	115	127	86	35.5599	24.9509	22.5933	16.8959	41.8468	52.4558	39.4892	58.1532	60.5108	47.5442	222	159	68	60	43.6149	13.3595
Feline_chaphamaparvovirus-MW404253.1-Italy-2019	1527	613	276	381	257	40.1441	18.0747	24.9509	16.8304	34.905	56.9745	41.7813	65.095	58.2187	43.0255	209	109	82	109	41.0609	16.11	21.4145	21.4145	37.5246	62.4754	42.8291	62.4754	57.1709	37.5246	182	115	127	85	35.7564	24.9509	22.5933	16.6994	41.6503	52.4558	39.2927	58.3497	60.7073	47.5442	222	157	67	63	43.6149	13.1631
Feline_chaphamaparvovirus-MW404254.1-Italy-2019	3054	1228	550	764	512	40.2096	18.0092	25.0164	16.7649	34.7741	56.9745	41.7813	65.2259	58.2187	43.0255	420	218	162	218	41.2574	15.9136	21.4145	21.4145	37.3281	62.6719	42.8291	62.6719	57.1709	37.3281	362	230	254	172	35.5599	24.9509	22.5933	16.8959	41.8468	52.4558	39.4892	58.1532	60.5108	47.5442	446	316	134	122	43.8114	13.1631
Feline_chaphamaparvovirus-MT708230.1-China-2019	1527	615	276	382	254	40.275	18.0747	25.0164	16.6339	34.7086	56.909	41.6503	65.2914	58.3497	43.091	209	109	80	111	41.0609	15.7171	21.4145	21.8075	37.5246	62.8684	43.222	62.4754	56.778	37.1316	182	114	130	83	35.7564	25.5403	22.3969	16.3065	41.8468	52.0629	38.7033	58.1532	61.2967	47.9371	224	159	66	60	44.0079	12.9666
Feline_chaphamaparvovirus-MT708231.1-China-2019	1527	613	276	380	258	40.1441	18.0747	24.8854	16.8959	34.9705	57.0399	41.7813	65.0295	58.2187	42.9601	208	108	81	112	40.8644	15.9136	21.2181	22.0039	37.9175	62.8684	43.222	62.0825	56.778	37.1316	181	115	127	86	35.5599	24.9509	22.5933	16.8959	41.8468	52.4558	39.4892	58.1532	60.5108	47.5442	224	157	68	60	44.0079	13.3595
Feline_chaphamaparvovirus-MZ031965.1-China-2020	1527	618	273	384	252	40.4715	17.8782	25.1473	16.5029	34.3811	56.9745	41.6503	65.6189	58.3497	43.0255	209	111	79	110	41.0609	15.5206	21.8075	21.611	37.1316	62.6719	43.4185	62.8684	56.5815	37.3281	182	114	128	85	35.7564	25.1473	22.3969	16.6994	41.8468	52.4558	39.0963	58.1532	60.9037	47.5442	227	159	66	57	44.5972	12.9666
Feline_chaphamaparvovirus-MZ031966.1-China-2020	1527	613	276	380	258	40.1441	18.0747	24.8854	16.8959	34.9705	57.0399	41.7813	65.0295	58.2187	42.9601	208	108	81	112	40.8644	15.9136	21.2181	22.0039	37.9175	62.8684	43.222	62.0825	56.778	37.1316	181	115	127	86	35.5599	24.9509	22.5933	16.8959	41.8468	52.4558	39.4892	58.1532	60.5108	47.5442	224	157	68	60	44.0079	13.3595
Feline_chaphamaparvovirus-OP499830.1-China-2022	1527	609	272	387	259	39.8821	17.8127	25.3438	16.9614	34.7741	56.8435	42.3052	65.2259	57.6948	43.1565	208	112	79	110	40.8644	15.5206	22.0039	21.611	37.1316	62.4754	43.6149	62.8684	56.3851	37.5246	180	115	128	86	35.3635	25.1473	22.5933	16.8959	42.0432	52.2593	39.4892	57.9568	60.5108	47.7407	221	160	65	63	43.4185	12.7701
Feline_chaphamaparvovirus-OP499831.1-China-2022	1527	610	272	387	258	39.9476	17.8127	25.3438	16.8959	34.7086	56.8435	42.2397	65.2914	57.7603	43.1565	208	112	79	110	40.8644	15.5206	22.0039	21.611	37.1316	62.4754	43.6149	62.8684	56.3851	37.5246	181	115	128	85	35.5599	25.1473	22.5933	16.6994	41.8468	52.2593	39.2927	58.1532	60.7073	47.7407	221	160	65	63	43.4185	12.7701
Feline_chaphamaparvovirus-OP499832.1-China-2022	1527	611	272	386	258	40.0131	17.8127	25.2783	16.8959	34.7086	56.909	42.1742	65.2914	57.8258	43.091	208	111	80	110	40.8644	15.7171	21.8075	21.611	37.3281	62.4754	43.4185	62.6719	56.5815	37.5246	182	115	127	85	35.7564	24.9509	22.5933	16.6994	41.6503	52.4558	39.2927	58.3497	60.7073	47.5442	221	160	65	63	43.4185	12.7701
Feline_chaphamaparvovirus-OP499833.1-China-2022	1527	610	272	387	258	39.9476	17.8127	25.3438	16.8959	34.7086	56.8435	42.2397	65.2914	57.7603	43.1565	208	112	79	110	40.8644	15.5206	22.0039	21.611	37.1316	62.4754	43.6149	62.8684	56.3851	37.5246	181	115	128	85	35.5599	25.1473	22.5933	16.6994	41.8468	52.2593	39.2927	58.1532	60.7073	47.7407	221	160	65	63	43.4185	12.7701
Feline_chaphamaparvovirus-MW404255.1-Italy-2019	1527	613	275	382	257	40.1441	18.0092	25.0164	16.8304	34.8396	56.9745	41.8468	65.1604	58.1532	43.0255	210	109	81	109	41.2574	15.9136	21.4145	21.4145	37.3281	62.6719	42.8291	62.6719	57.1709	37.3281	181	115	127	86	35.5599	24.9509	22.5933	16.8959	41.8468	52.4558	39.4892	58.1532	60.5108	47.5442	222	158	67	62	43.6149	13.1631
Feline_chaphamaparvovirus-MZ712100.1-Turkey-2020	1527	616	269	384	258	40.3405	17.6162	25.1473	16.8959	34.5121	57.2364	42.0432	65.4879	57.9568	42.7636	211	110	80	108	41.4538	15.7171	21.611	21.2181	36.9352	62.6719	42.8291	63.0648	57.1709	37.3281	179	115	125	90	35.167	24.558	22.5933	17.6817	42.2397	52.8487	40.275	57.7603	59.725	47.1513	226	159	64	60	44.4008	12.5737
Carnivore_chapparvovirus-MK448316.1-USA-2018	1554	558	287	442	267	35.9073	18.4685	28.4427	17.1815	35.6499	53.0888	45.6242	64.3501	54.3758	46.9112	186	120	83	129	35.9073	16.0232	23.166	24.9035	40.9266	60.8108	48.0695	59.0734	51.9305	39.1892	175	115	145	83	33.7838	27.9923	22.2008	16.0232	44.0154	49.8069	38.2239	55.9846	61.7761	50.1931	197	207	59	55	38.0309	11.39
Carnivore_chapparvovirus-MT123283.1-China-2018	1515	546	282	425	262	36.0396	18.6139	28.0528	17.2937	35.9076	53.3333	45.3465	64.0924	54.6535	46.6667	181	113	83	128	35.8416	16.4356	22.3762	25.3465	41.7822	61.1881	47.7228	58.2178	52.2772	38.8119	171	109	144	81	33.8614	28.5149	21.5842	16.0396	44.5545	49.901	37.6238	55.4455	62.3762	50.099	194	203	55	53	38.4158	10.8911
Carnivore_chapparvovirus-MT123284.1-China-2019	1515	544	283	425	263	35.9076	18.6799	28.0528	17.3597	36.0396	53.2673	45.4125	63.9604	54.5875	46.7327	180	115	82	128	35.6436	16.2376	22.7723	25.3465	41.5842	60.9901	48.1188	58.4158	51.8812	39.0099	173	109	144	79	34.2574	28.5149	21.5842	15.6436	44.1584	49.901	37.2277	55.8416	62.7723	50.099	191	201	57	56	37.8218	11.2871
Carnivore_chapparvovirus-MT123285.1-China-2019	1515	540	287	423	265	35.6436	18.9439	27.9208	17.4917	36.4356	53.1353	45.4125	63.5644	54.5875	46.8647	178	116	83	128	35.2475	16.4356	22.9703	25.3465	41.7822	60.5941	48.3168	58.2178	51.6832	39.4059	171	109	144	81	33.8614	28.5149	21.5842	16.0396	44.5545	49.901	37.6238	55.4455	62.3762	50.099	191	198	60	56	37.8218	11.8812
Carnivore_chapparvovirus-MT123286.1-China-2019	1515	543	286	424	262	35.8416	18.8779	27.9868	17.2937	36.1716	53.1353	45.2805	63.8284	54.7195	46.8647	178	115	83	129	35.2475	16.4356	22.7723	25.5446	41.9802	60.7921	48.3168	58.0198	51.6832	39.2079	172	109	144	80	34.0594	28.5149	21.5842	15.8416	44.3564	49.901	37.4257	55.6436	62.5743	50.099	193	200	59	53	38.2178	11.6832
Carnivore_chapparvovirus-MT123287.1-China-2019	1515	544	284	424	263	35.9076	18.7459	27.9868	17.3597	36.1056	53.2673	45.3465	63.8944	54.6535	46.7327	181	115	82	127	35.8416	16.2376	22.7723	25.1485	41.3861	60.9901	47.9208	58.6139	52.0792	39.0099	171	109	144	81	33.8614	28.5149	21.5842	16.0396	44.5545	49.901	37.6238	55.4455	62.3762	50.099	192	200	58	55	38.0198	11.4851
Carnivore_chapparvovirus-MT710947.1-Italy-2019	1515	547	281	426	261	36.1056	18.5479	28.1188	17.2277	35.7756	53.3333	45.3465	64.2244	54.6535	46.6667	179	115	82	129	35.4455	16.2376	22.7723	25.5446	41.7822	60.9901	48.3168	58.2178	51.6832	39.0099	172	110	143	80	34.0594	28.3168	21.7822	15.8416	44.1584	49.901	37.6238	55.8416	62.3762	50.099	196	201	56	52	38.8119	11.0891
Carnivore_chapparvovirus-MT710948.1-Italy-2019	1515	547	282	425	261	36.1056	18.6139	28.0528	17.2277	35.8416	53.3333	45.2805	64.1584	54.7195	46.6667	179	115	82	129	35.4455	16.2376	22.7723	25.5446	41.7822	60.9901	48.3168	58.2178	51.6832	39.0099	172	109	144	80	34.0594	28.5149	21.5842	15.8416	44.3564	49.901	37.4257	55.6436	62.5743	50.099	196	201	56	52	38.8119	11.0891
Carnivore_chapparvovirus-MN928790.1-China-2018	1515	542	286	422	265	35.7756	18.8779	27.8548	17.4917	36.3696	53.2673	45.3465	63.6304	54.6535	46.7327	181	115	82	127	35.8416	16.2376	22.7723	25.1485	41.3861	60.9901	47.9208	58.6139	52.0792	39.0099	172	107	146	80	34.0594	28.9109	21.1881	15.8416	44.7525	49.901	37.0297	55.2475	62.9703	50.099	189	200	58	58	37.4257	11.4851
Carnivore_chapparvovirus-MN928791.1-China-2019	1515	544	285	424	262	35.9076	18.8119	27.9868	17.2937	36.1056	53.2013	45.2805	63.8944	54.7195	46.7987	181	114	83	127	35.8416	16.4356	22.5743	25.1485	41.5842	60.9901	47.7228	58.4158	52.2772	39.0099	171	109	145	80	33.8614	28.7129	21.5842	15.8416	44.5545	49.703	37.4257	55.4455	62.5743	50.297	192	201	57	55	38.0198	11.2871
Carnivore_chapparvovirus-OK546100.1-Canada-2016	1515	543	284	425	263	35.8416	18.7459	28.0528	17.3597	36.1056	53.2013	45.4125	63.8944	54.5875	46.7987	180	115	82	128	35.6436	16.2376	22.7723	25.3465	41.5842	60.9901	48.1188	58.4158	51.8812	39.0099	172	109	144	80	34.0594	28.5149	21.5842	15.8416	44.3564	49.901	37.4257	55.6436	62.5743	50.099	191	201	58	55	37.8218	11.4851
Carnivore_chapparvovirus-OK546101.1-Canada-2009	1515	545	282	425	263	35.9736	18.6139	28.0528	17.3597	35.9736	53.3333	45.4125	64.0264	54.5875	46.6667	180	115	82	128	35.6436	16.2376	22.7723	25.3465	41.5842	60.9901	48.1188	58.4158	51.8812	39.0099	172	109	144	80	34.0594	28.5149	21.5842	15.8416	44.3564	49.901	37.4257	55.6436	62.5743	50.099	193	201	56	55	38.2178	11.0891
Carnivore_chapparvovirus-OK546102.1-Canada-2011	1515	554	277	419	265	36.5677	18.2838	27.6568	17.4917	35.7756	54.0594	45.1485	64.2244	54.8515	45.9406	179	119	78	129	35.4455	15.4455	23.5644	25.5446	40.9901	60.9901	49.1089	59.0099	50.8911	39.0099	173	108	144	80	34.2574	28.5149	21.3861	15.8416	44.3564	50.099	37.2277	55.6436	62.7723	49.901	202	192	55	56	40	10.8911
Carnivore_chapparvovirus-OM640108.1-Canada-2014	1515	549	282	425	259	36.2376	18.6139	28.0528	17.0957	35.7096	53.3333	45.1485	64.2904	54.8515	46.6667	182	115	82	126	36.0396	16.2376	22.7723	24.9505	41.1881	60.9901	47.7228	58.8119	52.2772	39.0099	172	109	144	80	34.0594	28.5149	21.5842	15.8416	44.3564	49.901	37.4257	55.6436	62.5743	50.099	195	201	56	53	38.6139	11.0891
Carnivore_chapparvovirus-OM640109.1-Canada-2014	1515	551	282	415	267	36.3696	18.6139	27.3927	17.6238	36.2376	53.9934	45.0165	63.7624	54.9835	46.0066	178	119	79	129	35.2475	15.6436	23.5644	25.5446	41.1881	60.7921	49.1089	58.8119	50.8911	39.2079	171	108	144	82	33.8614	28.5149	21.3861	16.2376	44.7525	50.099	37.6238	55.2475	62.3762	49.901	202	188	59	56	40	11.6832
[truncated: 15 more columns]
